1 **A coevolved EDS1-SAG101-NRG1 module mediates cell death signaling by TIR-**  
2 **domain immune receptors**

3 Dmitry Lapin<sup>1||</sup>, Viera Kovacova<sup>2,4||</sup>, Xinhua Sun<sup>1||</sup>, Joram Dongus<sup>1</sup>, Deepak D.  
4 Bhandari<sup>1</sup>, Patrick von Born<sup>1</sup>, Jaqueline Bautor<sup>1</sup>, Nina Guarneri<sup>1\*</sup>, Johannes  
5 Stuttmann<sup>3</sup>, Andreas Beyer<sup>2</sup>, Jane E. Parker<sup>1,5</sup>

6 || - these authors contributed equally

7 **Author affiliations:**

8 <sup>1</sup> – Department of Plant-Microbe Interactions, Max-Planck Institute for Plant Breeding  
9 Research, Carl-von-Linné Weg 10, 50829 Cologne, Germany

10 <sup>2</sup> - Cellular Networks and Systems Biology, CECAD, University of Cologne, Joseph-  
11 Stelzmann-Str. 26, Cologne 50931, Germany

12 <sup>3</sup> - Department of Genetics, Institute for Biology, Martin Luther University Halle-  
13 Wittenberg, Weinbergweg 10, Halle 06120, Germany

14 <sup>4</sup> - Faculty of statistical physics of biological systems, predictive models of evolution,  
15 Institute for Biological Physics, University of Cologne, Zùlpicher Str. 77, Cologne  
16 50937, Germany

17 <sup>5</sup> - Cologne-Dùsseldorf Cluster of Excellence in Plant Sciences (CEPLAS)

18 \* - present address: Laboratory of Nematology, Wageningen University,  
19 Droevendaalsesteeg 1, 6708 PB, Wageningen, the Netherlands

20 **Corresponding author:**

21 Jane E. Parker ([parker@mpipz.mpg.de](mailto:parker@mpipz.mpg.de))

22 **Short title (<40 characters):**

23 Reconstituting an NLR cell death branch

24 Material distribution policy: The authors responsible for distribution of materials  
25 integral to the findings presented in this study in accordance with the policy described  
26 in the Instructions for Authors ([www.plantcell.org](http://www.plantcell.org)) are: Jane E. Parker  
27 ([parker@mpipz.mpg.de](mailto:parker@mpipz.mpg.de)) and Dmitry Lapin ([lapin@mpipz.mpg.de](mailto:lapin@mpipz.mpg.de)).

28 **Abstract (~200 words)**

29 Plant intracellular nucleotide-binding/leucine-rich repeat (NLR) immune receptors are  
30 activated by pathogen effectors to trigger host defenses and cell death. Toll-  
31 Interleukin1-receptor (TIR)-domain NLRs (TNLs) converge on the Enhanced Disease  
32 Susceptibility1 (EDS1) family of lipase-like proteins for all resistance outputs. In  
33 Arabidopsis TNL immunity, *AtEDS1* heterodimers with Phytoalexin Deficient4  
34 (*AtPAD4*) transcriptionally boost basal defense pathways. *AtEDS1* uses the same  
35 surface to interact with PAD4-related Senescence-Associated Gene101 (*AtSAG101*),  
36 but the role of *AtEDS1-AtSAG101* heterodimers was unclear. We show that *AtEDS1-*  
37 *AtSAG101* function together with *AtNRG1* coiled-coil domain helper NLRs as a  
38 coevolved TNL cell death signaling module. *AtEDS1-AtSAG101-AtNRG1* cell death  
39 activity is transferable to the solanaceous species, *Nicotiana benthamiana*, and  
40 cannot be substituted by *AtEDS1-AtPAD4* with *AtNRG1* or *AtEDS1-AtSAG101* with  
41 endogenous *NbNRG1*. Analysis of EDS1-family evolutionary rate variation and  
42 heterodimer structure-guided phenotyping of *AtEDS1* variants or *AtPAD4-AtSAG101*  
43 chimeras identify closely aligned  $\alpha$ -helical coil surfaces in the *AtEDS1-AtSAG101*  
44 partner C-terminal domains that are necessary for TNL cell death signaling. Our data  
45 suggest that TNL-triggered cell death and pathogen growth restriction are determined  
46 by distinctive features of EDS1-SAG101 and EDS1-PAD4 complexes and that these  
47 signaling machineries coevolved with further components within plant species or  
48 clades to regulate downstream pathways in TNL immunity.

49

50

## 51 Introduction

52 In plants, immunity to host-adapted pathogens is mediated by large, diversified  
53 families of intracellular nucleotide-binding/leucine-rich repeat (NLR) receptors whose  
54 members recognize specific pathogen virulence factors (effectors) that are delivered  
55 into host cells to promote infection (Baggs et al., 2017). NLRs are ATP/ADP-binding  
56 molecular switches and their activation by effectors involves intra- and intermolecular  
57 conformational changes, which lead to rapid host gene expression changes,  
58 induction of antimicrobial pathways and, often, localized cell death called a  
59 hypersensitive response (HR) (Cui et al., 2015; Jones et al., 2016). A signature of  
60 plant NLR immunity is the induction of multiple transcriptional sectors which can  
61 buffer the host against pathogen interference (Tsuda et al., 2013; Cui et al., 2018;  
62 Mine et al., 2018; Bhandari et al., 2019). How NLR receptors initiate downstream  
63 resistance pathways in effector-triggered immunity (ETI) remains unclear.

64 Two major pathogen-sensing NLR receptor classes, TIR-NLRs (also called TNLs)  
65 and CC-NLRs (CNLs), are broadly defined by their N-terminal Toll/interleukin-1  
66 receptor (TIR) or coil-coiled (CC) domains. Evidence suggests that these domains  
67 serve in receptor activation and signaling (Cui et al., 2015; Zhang et al., 2016a).  
68 Different NLR protein families characterized in *Arabidopsis* and *Solanaceae* species  
69 function together with pathogen-detecting (sensor) NLRs in ETI and are thus  
70 considered 'helper' NLRs (Wu et al., 2018a) that might bridge between sensor NLRs  
71 and other immunity factors. Members of the *NRC* (*NLR required for HR-associated*  
72 *cell death*) gene family, which expanded in Asterids, signal in ETI conferred by  
73 partially overlapping sets of phylogenetically related sensor CNLs (Wu et al., 2017).  
74 Two sequence-related NLR groups, N Required Gene1 (NRG1, (Peart et al., 2005;  
75 Qi et al., 2018)) and Accelerated Disease Resistance1 (ADR1, (Bonardi et al., 2011))  
76 signaling NLRs, were originally classified by a distinct CC domain sequence (referred  
77 to as CC<sub>R</sub>) shared with the *Arabidopsis* Resistance to Powdery Mildew8 (RPW8)  
78 family of immunity proteins (Collier et al., 2011). Subsequent analysis revealed that  
79 although monocot ADR1s lack the CC<sub>R</sub> (Zhong and Cheng, 2016), these NLRs share  
80 a phylogenetically-distinct nucleotide-binding domain (Shao et al., 2016; Zhong and  
81 Cheng, 2016). Studies of *NRG1* and *ADR1* mutants in *Arabidopsis* and *Nicotiana*  
82 *benthamiana* revealed important roles of the genes in ETI (Peart et al., 2005; Bonardi  
83 et al., 2011; Dong et al., 2016; Castel et al., 2018; Qi et al., 2018; Wu et al., 2018b).

84 Notably, *NRG1* genes are necessary for eliciting host cell death in several TNL but  
85 not CNL receptor responses (Castel et al., 2018; Qi et al., 2018). By contrast, three  
86 Arabidopsis *ADR1* genes (*AtADR1*, *AtADR1-L1* and *AtADR1-L2*) act redundantly in  
87 signaling downstream of CNL and TNL receptors (Bonardi et al., 2011; Dong et al.,  
88 2016; Wu et al., 2018b). In resistance to bacteria triggered by the Arabidopsis sensor  
89 CNL Resistant to *Pseudomonas syringae*2 (RPS2), *ADR1*-family genes stimulated  
90 accumulation of the disease resistance hormone salicylic acid (SA) and cell death  
91 (Bonardi et al., 2011). Analysis of flowering plant (angiosperm) genomes indicated  
92 presence of *NRG1* and *TNL* genes in eudicot lineages and loss of these genes from  
93 monocots and several eudicots (Collier et al., 2011; Shao et al., 2016; Zhang et al.,  
94 2016b). By contrast, Arabidopsis *ADR1* orthologs are present in eudicot and monocot  
95 species (Collier et al., 2011; Shao et al., 2016). So far, there was no evidence of  
96 molecular interactions between sensor and helper NLRs.

97 All studied TNL receptors, activated by pathogen effectors in ETI or as auto-active  
98 molecules (producing autoimmunity), signal via the non-NLR protein, Enhanced  
99 Disease Susceptibility1 (EDS1) for transcriptional defense reprogramming and cell  
100 death (Wiermer et al., 2005; Wirthmueller et al., 2007; García et al., 2010; Xu et al.,  
101 2015; Adlung et al., 2016; Ariga et al., 2017; Qi et al., 2018). EDS1 is therefore a key  
102 link between TNL activation and resistance pathway induction. Consistent with an  
103 early regulatory role in TNL signaling, *AtEDS1* interacts with a number of nuclear  
104 TNLs (Bhattacharjee et al., 2011; Heidrich et al., 2011; Kim et al., 2012). Also, an  
105 interaction between *NbEDS1a* and *NbNRG1* was recently reported (Qi et al., 2018).  
106 Together with Phytoalexin Deficient4 (*PAD4*) and Senescence-Associated Gene101  
107 (*SAG101*), EDS1 constitutes a small family which was found in angiosperms but not  
108 non-seed species, post-dating the origin of *NLR* genes in plants (Wagner et al., 2013;  
109 Gao et al., 2018). Phylogenetic sampling of 16 angiosperm species indicated that  
110 *EDS1* and *PAD4* are present in eudicots and monocots, whereas *SAG101* (like  
111 *NRG1* and *TNLs*) was not detected in monocot genomes (Collier et al., 2011;  
112 Wagner et al., 2013).

113 The three EDS1-family proteins possess an N-terminal  $\alpha/\beta$ -hydrolase fold domain  
114 with similarity to eukaryotic class-3 lipases and a unique C-terminal  $\alpha$ -helical bundle,  
115 referred to as the 'EP' domain (pfam id: PF18117) (Wagner et al., 2013). *AtEDS1*  
116 forms exclusive heterodimers with *AtPAD4* and *AtSAG101* through N- and C-terminal

117 contacts between the partner domains (Feys et al., 2001; Feys et al., 2005; Rietz et  
118 al., 2011; Wagner et al., 2013). Genetic, molecular and protein structural evidence  
119 from *Arabidopsis* revealed a function of *AtEDS1* heterodimers with *AtPAD4* in basal  
120 immunity that is boosted by TNLs in ETI via an unknown mechanism (Feys et al.,  
121 2005; Rietz et al., 2011; Bhandari et al., 2019). *EDS1-PAD4* basal immunity limits the  
122 growth of infectious (virulent) pathogens without host cell death and is thus thought to  
123 reflect a core *EDS1-PAD4* immunity function (Zhou et al., 1998; Rietz et al., 2011;  
124 Cui et al., 2017). In *Arabidopsis* accession Col-0 (Col), ETI conferred by the nuclear  
125 TNL pair Resistant to *Ralstonia solanacearum* 1S - Resistant to *Pseudomonas*  
126 *syringae* 4 (RRS1S-RPS4) recognizing *Pseudomonas syringae* effector AvrRps4 has  
127 been used extensively to investigate *AtEDS1-AtPAD4* signaling (Heidrich et al., 2011;  
128 Saucet et al., 2015). Col *RRS1S-RPS4* ETI is associated with a weak cell death  
129 response (Heidrich et al., 2011), and to bolster basal immunity, *AtEDS1-AtPAD4*  
130 complexes steer host transcriptional programs towards SA-induced defenses and  
131 away from SA-antagonizing jasmonic acid (JA) pathways (Zheng et al., 2012; Cui et  
132 al., 2018; Bhandari et al., 2019). This signaling involves positively charged amino  
133 acids at an *AtEDS1* EP domain surface lining a cavity formed by the *EDS1*-family  
134 heterodimers (Bhandari et al., 2019). The function of *EDS1-SAG101* complexes in  
135 TNL ETI was not determined, although *AtSAG101* but not *AtPAD4* was required for  
136 autoimmunity conditioned by the TNL pair Chilling Sensitive 3/Constitutive Shade  
137 Avoidance 1 (CHS3/CSA1) (Xu et al., 2015). Also, TNL ETI but not basal immunity  
138 was retained in *Arabidopsis* accession *Ws-2* expressing an *AtEDS1* variant  
139 (*EDS1<sup>L262P</sup>*) which formed stable complexes with *SAG101* but not *PAD4* (Rietz et al.,  
140 2011). These data suggest that *AtEDS1-AtPAD4* and *AtEDS1-AtSAG101*  
141 heterodimers have distinctive roles in TNL ETI.

142 Here we examine *EDS1*-family sequence variation across seed plant lineages and  
143 test whether *EDS1-PAD4* and *EDS1-SAG101* complexes are functionally  
144 transferable between different plant groups. Despite high levels of conservation, we  
145 find there are barriers to *EDS1* heterodimer functionality between plant lineages. By  
146 measuring TNL immunity resistance and cell death outputs in *Arabidopsis* and  
147 tobacco (*Nicotiana benthamiana*) ETI pathway mutants, we establish that *AtEDS1*  
148 and *AtSAG101* cooperate with *AtNRG1* but not with tobacco *NRG1* (*NbNRG1*) in  
149 TNL cell death signaling. We provide evidence that *AtEDS1* and *AtPAD4* have a

150 different immunity role that limits bacterial pathogen growth. A structure-guided  
151 analysis of *AtEDS1* and *AtPAD4/AtSAG101* variants indicates decision-making  
152 between cell death and bacterial growth inhibition branches in TNL (*RRS1S-RPS4*)  
153 immunity is determined by distinctive features of the EDS1-SAG101 and EDS1-PAD4  
154 complexes. Our data suggest that signaling machineries co-evolved within plant  
155 species and clades for regulating downstream pathways in TNL immunity.

156

157 **Results**

158 **Dicot plants from the order *Caryophyllales* lack predicted SAG101 orthologs**

159 A previous study showed that EDS1 and PAD4 encoding genes are present in  
160 flowering plants (angiosperms) (Wagner et al., 2013). Here, we investigated the  
161 distribution of EDS1-family members using recent genomic information. Analysis of  
162 protein-sequence orthogroups from genomes of 52 green plants shows that EDS1  
163 and PAD4 are present in 46 seed plant species, including conifers (Supplemental  
164 Table 1, Supplemental Dataset 5, 6, 7), suggesting that the EDS1 family arose in a  
165 common ancestor of gymno- and angiosperms. We did not detect EDS1-family  
166 orthologs in the aquatic monocot *Spirodela polyrhiza* (duckweed). As reported  
167 (Wagner et al., 2013), *AtSAG101* orthologs are absent from monocots and the basal  
168 eudicot *Aquilegia* and *Erythranthe guttata* (order *Lamiales*, formerly *Mimulus*  
169 *guttatus*). Here, SAG101 was also not found in conifers or the eudicot species *Beta*  
170 *vulgaris* (sugar beet) from the order *Caryophyllales* (Supplemental Table 1).  
171 Reciprocal BLAST searches failed to identify putative *AtSAG101* orthologs in  
172 genomes and transcriptomes of nine additional *Caryophyllales* genomes (quinoa,  
173 amaranth, six species from *Silene* genus and spinach). We concluded that loss of  
174 *SAG101* is likely common not only to monocots but also *Caryophyllales* eudicot  
175 species.

176

FIGURE 1

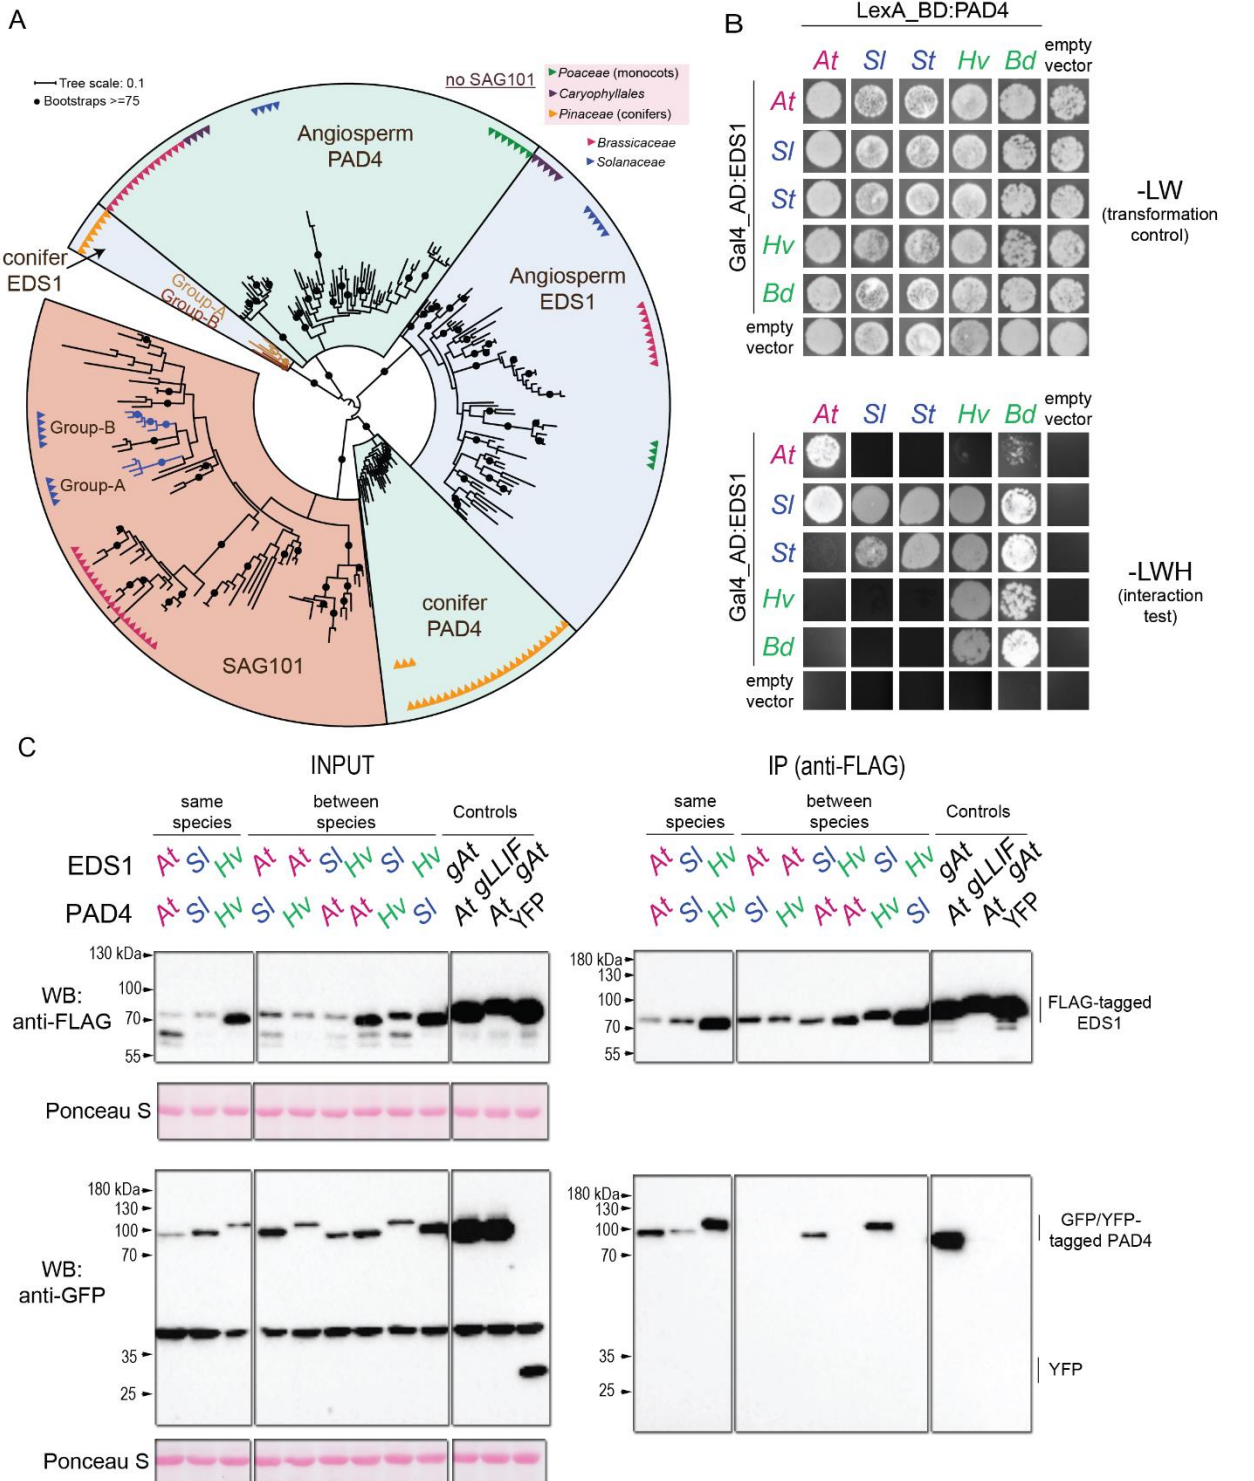

**Phylogeny of EDS1 family proteins in seed plants and conservation of EDS1-PAD4 interactions in angiosperms.**

(A) Maximum-likelihood tree of 256 sequences from predicted EDS1-family proteins. Branches with Felsenstein's bootstrap support values  $\geq 75$  are given as black dots. EDS1, PAD4 and SAG101 orthologs form separate groups. Solanaceae SAG101 fall into two groups – A and B. Similarly, conifers have two EDS1 groups labeled A and B.

(B) A yeast-two-hybrid assay testing interactions between EDS1 and PAD4 from Arabidopsis (*At*), tomato (*Sl*), potato (*St*), barley (*Hv*) and Brachypodium (*Bd*). –LW drop out selection medium without leucine and tryptophan. –LWH medium without leucine, tryptophan and histidine. Each combination shown was tested in 2-4 independent experiments with similar results.

(C) Western blot analysis showing proteins before (INPUT) and after immunoprecipitation (IP) assay to test *in planta* interactions between Arabidopsis (*At*), tomato (*Sl*) and barley (*Hv*) EDS1 and PAD4 orthologs as indicated, and detected with  $\alpha$ -FLAG or  $\alpha$ -GFP antibodies. Proteins were transiently co-expressed in *N. benthamiana*. IPs using Arabidopsis (*At*) pEDS1:gEDS1-3xFLAG (gAt) or pEDS1:gEDS1\_LLI/AAAAA-3xFLAG (gLLIF) with Arabidopsis (*At*) 35S:PAD4-YFP served as positive and negative controls, respectively. Ponceau S staining of the membrane shows equal loading of input samples. Combinations tested in four independent experiments with the exception of FLAG-SlEDS1/YFP-HvPAD4 and FLAG-HvEDS1/YFP-SlPAD4, which were repeated twice.

177

178 Next, we used 256 sequences of EDS1-family orthologs identified with OrthoMCL,  
 179 and additional BLAST searches to infer fine-grained phylogenetic relationships



180 (Figure 1, Supplemental Figure 1, see Methods). On a maximum likelihood  
181 phylogenetic tree (Figure 1A), EDS1, PAD4 and SAG101 predicted proteins of  
182 flowering plants form clearly separated nodes. Conifer EDS1 and PAD4 belong to  
183 distinct clades that do not fall into the EDS1 and PAD4 of flowering plant groups.  
184 Therefore, functions of EDS1-family proteins might have diverged significantly  
185 between conifers and flowering plants. Conifer EDS1 further separated into two well-  
186 supported branches. Analyzed *Solanaceae* genomes (with the exception of pepper,  
187 *Capsicum annuum*) encode SAG101 proteins in two well-supported groups, we refer  
188 to as A and B (Figure 1A), suggesting SAG101 diversification within *Solanaceae*.  
189 Because the EDS1-family tree topology is not known, we also performed a Bayesian  
190 inference of phylogeny (MrBayes phylotree; Supplemental Figure 1A), which  
191 supported conclusions made from the maximum likelihood tree analysis (Figure 1A).

192 Although *Brassicaceae*, *Caryophyllales* and *Poaceae* EDS1 and PAD4 form well  
193 supported clades (Figure 1A, Supplemental Figure 1A), generally the EDS1-family  
194 does not provide sufficient resolution to separate other groups within flowering plants.  
195 This might be explained by conservation of the proteins and negative selection.  
196 Indeed, EDS1 sequences in *Brassicaceae*, *Solanaceae* and *Poaceae* appear to have  
197 evolved mainly under purifying selection constraints (62.0-88.4% of sites,  
198 Supplemental Table 2). Mapping of evolutionary rates obtained with the refined  
199 EDS1, PAD4 and SAG101 phylogenetic trees (see Methods) showed that slowly  
200 evolving (conserved) amino acids are present in the core lipase-like domain  $\alpha/\beta$ -  
201 hydrolase folds and EP domain  $\alpha$ -helical bundles likely to preserve structural stability,  
202 but also on the partner EP domain surfaces lining the heterodimer cavity  
203 (Supplemental Figure 1B). Several conserved amino acids on this cavity surface of  
204 *At*EDS1 are essential for TNL immunity (Bhandari et al., 2019). The hydrophobic  
205 character of 'LLIF'  $\alpha$ -helix (H) in the *At*EDS1 lipase-like domain, which contacts  
206 hydrophobic pockets in corresponding *At*PAD4 and *At*SAG101 domains (Wagner et  
207 al., 2013), is also conserved across species (Supplemental Figure 1C). While EDS1  
208 sequences in three flowering plant families appear to have evolved mainly under  
209 purifying selection (Supplemental Table 2), further analysis of evolutionary  
210 constraints indicated positive selection in *Brassicaceae* EDS1 sequences at five  
211 positions with multinucleotide mutations: R16, K215, Q223, R231 and K487 (Col  
212 *At*EDS1 AT3G48090 coordinates; Supplemental Figure 1D, 1E, Supplemental Table

213 2). These amino acids are surface-exposed on the crystal structure of *At*EDS1, the  
214 first four being located in the lipase-like domain, and K487 in the EP domain  
215 (Supplemental Figure 1E). Whether this variation has adaptive significance is unclear  
216 since an *At*EDS1<sup>K487R</sup> variant retained TNL immunity function (Bhandari et al., 2019).

217 In summary, we find that EDS1 and PAD4 orthologs are present in conifers as well  
218 as flowering plants and form phylogenetically distinct sequence groups in these  
219 lineages. This suggests an origin of the EDS1 family in a common ancestor of seed  
220 plants. Also, multiple species of the eudicot lineage *Caryophyllales* lack SAG101  
221 orthologs, suggesting that loss of *SAG101* is not a sporadic event in the evolution of  
222 eudicots.

223

## 224 **Interactions between EDS1-family proteins from eudicot and monocot species**

225 High conservation at the lipase-like EP domain interfaces of EDS1-SAG101 and  
226 EDS1-PAD4 (Supplemental Figure 1B) would be in line with heterodimer formation  
227 between partners in species other than *Arabidopsis* and, potentially, interactions  
228 between EDS1 and PAD4 or SAG101 originating from different phylogenetic groups.  
229 We therefore tested EDS1-family proteins interactions within and between  
230 representative species of eudicot (*Brassicaceae*, *Solanaceae*) and monocot  
231 (*Poaceae*) families. In yeast-2-hybrid (Y2H) assays, EDS1 and PAD4 from the same  
232 species or family formed a complex (Figure 1B). Notably, tomato (*Solanum*  
233 *lycopersicum*) EDS1 (*S*/EDS1) also interacted with *At*PAD4 and barley (*Hordeum*  
234 *vulgare*) and *Brachypodium distachyon* PAD4 proteins (*Hv*PAD4 and *Bd*PAD4)  
235 (Figure 1B). By contrast, *At*EDS1 and monocot *Hv*EDS1 or *Bd*EDS1 did not interact  
236 with either *S*/PAD4 or potato (*Solanum tuberosum*) *St*PAD4. These data show that  
237 EDS1 and PAD4 partners in species that are distant from *Arabidopsis* also interact  
238 physically and there are some between-clade associations.

239 We selected *Arabidopsis*, tomato and barley EDS1-PAD4 combinations for *in planta*  
240 co-immunoprecipitation (IP) assays of epitope-tagged proteins transiently expressed  
241 after *Agrobacterium tumefaciens* (agroinfiltration) of *N. benthamiana* leaves. As  
242 expected, *At*PAD4-YFP immunoprecipitated (IPed) with coexpressed *At*EDS1-FLAG.  
243 This interaction was strongly reduced when the *At*EDS1 'LLIF' N-terminal  
244 heterodimer contact was mutated ((Wagner et al., 2013), Figure 1C). In accordance

245 with the Y2H data, YFP-*S*PAD4 and YFP-*Hv*PAD4 IPed with FLAG-EDS1 from the  
246 same species (*S*EDS1 and *Hv*EDS1). Also, FLAG-*S*EDS1 interacted with YFP-  
247 *At*PAD4 and YFP-*Hv*PAD4, but FLAG-*At*EDS1 did not interact with either YFP-  
248 *S*PAD4 or YFP-*Hv*PAD4 (Figure 1C). Similarly, FLAG-*Hv*EDS1 failed to interact with  
249 YFP-*At*PAD4 or YFP-*S*PAD4 (Figure 1C). Hence, EDS1 and PAD4 from the same  
250 eudicot or monocot species form stable complexes *in planta* like *At*EDS1-*At*PAD4,  
251 suggesting that EDS1-PAD4 heterodimer formation is a conserved feature across  
252 angiosperms. In Y2H and *in planta*, between-clade complex formation is not  
253 universal, indicating that there are barriers to certain EDS1-PAD4 partner interactions  
254 between distant lineages.

255 We also tested in *N. benthamiana* transient assays whether *S*EDS1 or *At*EDS1 can  
256 form complexes with SAG101 proteins from *Solanaceae* (*N. benthamiana*) and  
257 Arabidopsis (Supplemental Figure 2). *S. lycopersicum* has two *SAG101* genes, which  
258 fall respectively into *Solanaceae* SAG101 groups A and B (Figure 1A, Supplemental  
259 Figure 1A) and are most sequence-related to *N. benthamiana* *NbSAG101a* and  
260 *NbSAG101b* (81.52 and 72.44% sequence identity; Supplemental Dataset 1). As  
261 expected, *At*EDS1-FLAG interacted with *At*SAG101-YFP in IP assays (Supplemental  
262 Figure 2A). Also, FLAG-*S*EDS1 interacted with *NbSAG101a*-GFP and *NbSAG101b*-  
263 GFP, consistent with the close phylogenetic relationship between cultivated tomato  
264 and *N. benthamiana*. Notably, FLAG-*S*EDS1 IPed *At*SAG101-YFP, but *At*EDS1-  
265 FLAG did not IP *NbSAG101a* or *NbSAG101b* (Supplemental Figure 2A), similar to  
266 the *At*EDS1/*S*PAD4 combinations (Figure 1B and 1C). As shown previously (Feys et  
267 al., 2005), *At*SAG101-YFP localized to the nucleus, whereas *NbSAG101a*-GFP and  
268 *NbSAG101b*-GFP had a nucleocytoplasmic distribution in *N. benthamiana*  
269 (Supplemental Figure 2B). Together, the data suggest that EDS1-partner interactions  
270 are conserved across angiosperms, but there are some restrictions to protein  
271 interactions between different taxonomic groups.

272

### 273 **Tomato EDS1-PAD4 are functional in Arabidopsis *TNL RPP4* immunity**

274 The above data show that tomato EDS1 (*S*EDS1) forms a stable complex with  
275 tomato and Arabidopsis PAD4 proteins (Figure 1B and 1C). We therefore tested  
276 whether *S*EDS1-*S*PAD4 signal together or with respective *At*EDS1 and *At*PAD4

277 partners in Arabidopsis TNL immunity (Figure 2). For this, four EDS1-PAD4 co-  
278 expression constructs (*AtEDS1-AtPAD4*, *S $\epsilon$ EDS1-S $\epsilon$ PAD4*, *S $\epsilon$ EDS1-AtPAD4*,  
279 *AtEDS1-S $\epsilon$ PAD4*; Figure 2A) were transformed into a triple *eds1-2 pad4-1 sag101-3*  
280 mutant line in accession Col-0 (Col). Arabidopsis or tomato EDS1 and PAD4 coding  
281 sequences were fused to N-terminal FLAG and YFP tags, respectively. Expression of  
282 the genes was driven by Arabidopsis *EDS1* and *PAD4* promoters (Gantner et al.,  
283 2018). Three independent transgenic lines expressing the tagged proteins (Figure  
284 2A) were selected and spray-inoculated with the downy mildew pathogen  
285 *Hyaloperonospora arabidopsidis* (*Hpa*) isolate Emwa1, which is recognized in Col by  
286 TNL receptor RPP4 (Van Der Biezen et al., 2002). Pathogen spores were quantified  
287 on leaves at 7 d post inoculation (dpi). Col expressing StrepII-3xHA-YFP was  
288 resistant to *Hpa* Emwa1 while *eds1-2 pad4-1 sag101-1* and accession Ws-2 (which  
289 lacks *RPP4* (Holub, 1994)) were susceptible (Figure 2B). The *AtEDS1-AtPAD4* pair  
290 fully restored *Hpa* resistance in *eds1-2 pad4-1 sag101-3* (Figure 2B), consistent with  
291 an EDS1-PAD4 heterodimer being necessary and sufficient for TNL immunity in  
292 Arabidopsis (Glazebrook et al., 1997; Feys et al., 2001; Rietz et al., 2011; Wagner et  
293 al., 2013). The *S $\epsilon$ EDS1-S $\epsilon$ PAD4* pair also conferred full *RPP4* immunity (Figure 2B).  
294 Thus, *S $\epsilon$ EDS1-S $\epsilon$ PAD4* is functionally transferable from tomato to Arabidopsis. By  
295 contrast, between-species EDS1-PAD4 combinations *AtEDS1-S $\epsilon$ PAD4* and *S $\epsilon$ EDS1-*  
296 *AtPAD4* did not fully prevent *Hpa* sporulation. While no *RPP4* resistance was  
297 detected in Arabidopsis lines expressing *AtEDS1-S $\epsilon$ PAD4* (which did not interact in  
298 Y2H and IP assays (Figures 1B and 1C), there was a partial resistance response in  
299 plants expressing *S $\epsilon$ EDS1-AtPAD4* (Figure 2B), which did interact (Figure 1B and  
300 1C). We reasoned that the between-clade *S $\epsilon$ EDS1-AtPAD4* combination likely retains  
301 some TNL resistance signaling function because it can form a heterodimer (Figure  
302 1B and 1C), but incompatibility with Arabidopsis factors might prevent it from  
303 functioning fully in Arabidopsis TNL (*RPP4*) signaling.

304

FIGURE 2

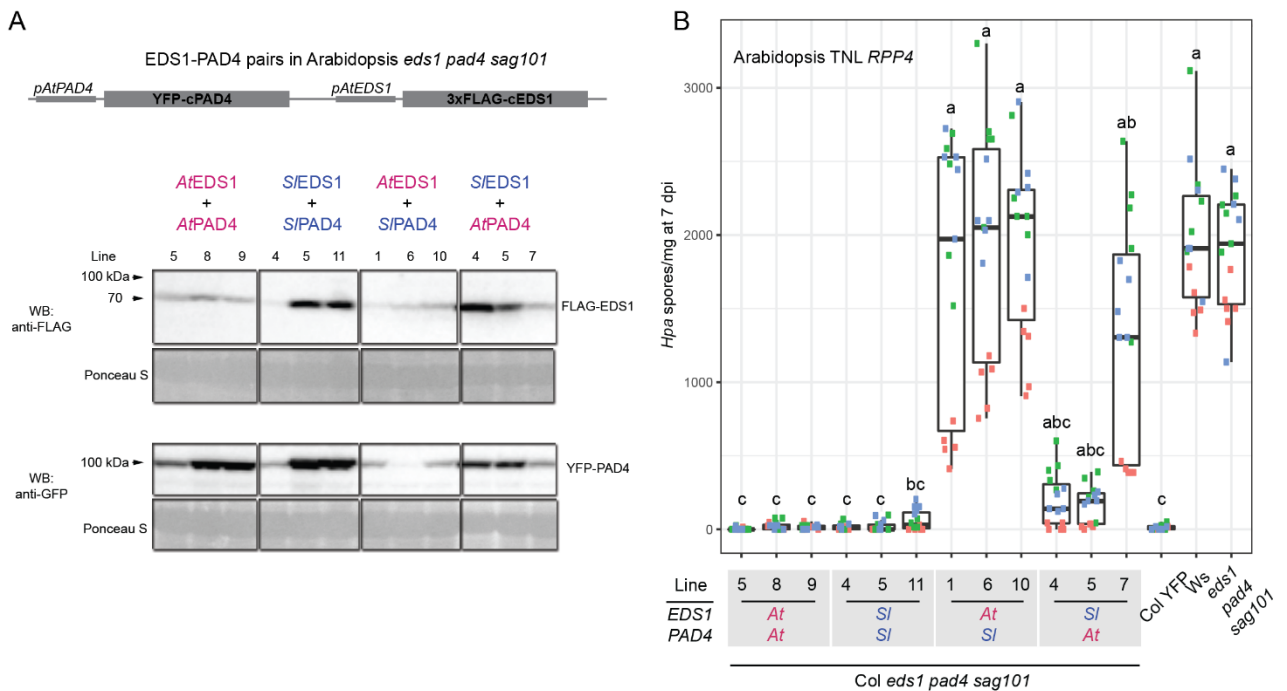

**A tomato EDS1-PAD4 pair functions in Arabidopsis TNL *RPP4* immunity.**

(A) Upper panel: schematic representation of a Golden Gate assembled fragment to express coding sequences of Arabidopsis (*At*) and tomato (*Sl*) EDS1 and PAD4 under the control of corresponding Arabidopsis promoters in Arabidopsis Col *eds1-2 pad4-1 sag101-3*. Lower panel: Western blot analysis FLAG-EDS1 and YFP-PAD4 proteins in Arabidopsis T3 independent transgenic lines, as indicated, after *Hpa* Emwa1 infection (3 dpi, panel B). Ponceau S staining of the membrane served as a loading control. The analysis was performed twice with similar results.

(B) A TNL (*RPP4*) resistance assay in the same T3 independent transgenic lines as shown in (A, lower panel). *Hpa* Emwa1 conidiospores on leaves were quantified at 7 dpi. An Arabidopsis Col YFP (resistant), *Ws-2* (*rpp4*, susceptible) and non-transformed *eds1-2 pad4-1 sag101-1* (susceptible) served as controls. Data from three independent experiments (biological replicates) are represented on a box-plot with dots in the same color corresponding to technical replicates (individual normalized spore counts) from one independent experiment. Genotypes sharing letters above box-whiskers on the plot do not show statistically significant differences (Nemenyi test with Bonferroni correction for multiple testing,  $\alpha=0.01$ ,  $n=15$ ).

305

306 ***SlEDS1* with *SlSAG101b* confer *N. benthamiana* TNL *Roq1* immunity**

307 To explore further whether EDS1-family members are functionally transferable  
 308 between eudicot species for TNL immunity, we exploited the *N. benthamiana* TNL  
 309 *Recognition of XopQ1* (*Roq1*) resistance system. *Roq1* recognizes the Type III-  
 310 secreted effector *XopQ* delivered from leaf-infecting *Xanthomonas campestris* pv.  
 311 *vesicatoria* (*Xcv*) bacteria (Adlung et al., 2016; Schultink et al., 2017). This  
 312 recognition induces *NbEDS1a*-dependent cell death and resistance to pathogen  
 313 growth (Adlung et al., 2016; Schultink et al., 2017; Qi et al., 2018). We used  
 314 Agrobacteria-mediated transient expression of proteins in *N. benthamiana* in  
 315 combination with simultaneous *Xcv* infiltration or *XopQ*-myc agroinfiltration of leaf  
 316 sectors to monitor TNL *Roq1* resistance and cell death, respectively (Figure 3,  
 317 Supplemental Figure 3). For the assays (setup outlined on Figure 3A), WT *N.*  
 318 *benthamiana* and reported *Nbeds1a*, *Nbpad4* single and *Nbeds1a pad4* double  
 319 mutants (Ordon et al., 2017), as well as *N. benthamiana pad4 sag101a sag101b*  
 320 triple mutant (abbreviated to *Nb-pss*, (Gantner et al., 2019)) were used. We first  
 321 tested whether agroinfiltration interferes with *Roq1* resistance to *Xcv* growth

322 (Supplemental Figure 3A). Streptomycin (at 150-200 ug/l) allowed selective growth  
323 on agar plates of *Xcv* but not *A. tumefaciens* strain GV3101 bacteria extracted from  
324 leaves. *A. tumefaciens* infiltrated at two densities (OD<sub>600</sub> 0.1 and 0.4, strain to  
325 express YFP) did not affect *Xcv* growth in susceptible *Nbeds1a* but further reduced  
326 low *Xcv* proliferation in resistant WT *N. benthamiana* leaves (Supplemental Figure  
327 3A). We took the 2.5-3 log<sub>10</sub> difference in *Xcv* titers between WT and *Nbeds1a* upon  
328 agroinfiltration as a measure of *EDS1*-dependent *TNL* resistance to *Xcv* growth.

329

FIGURE 3

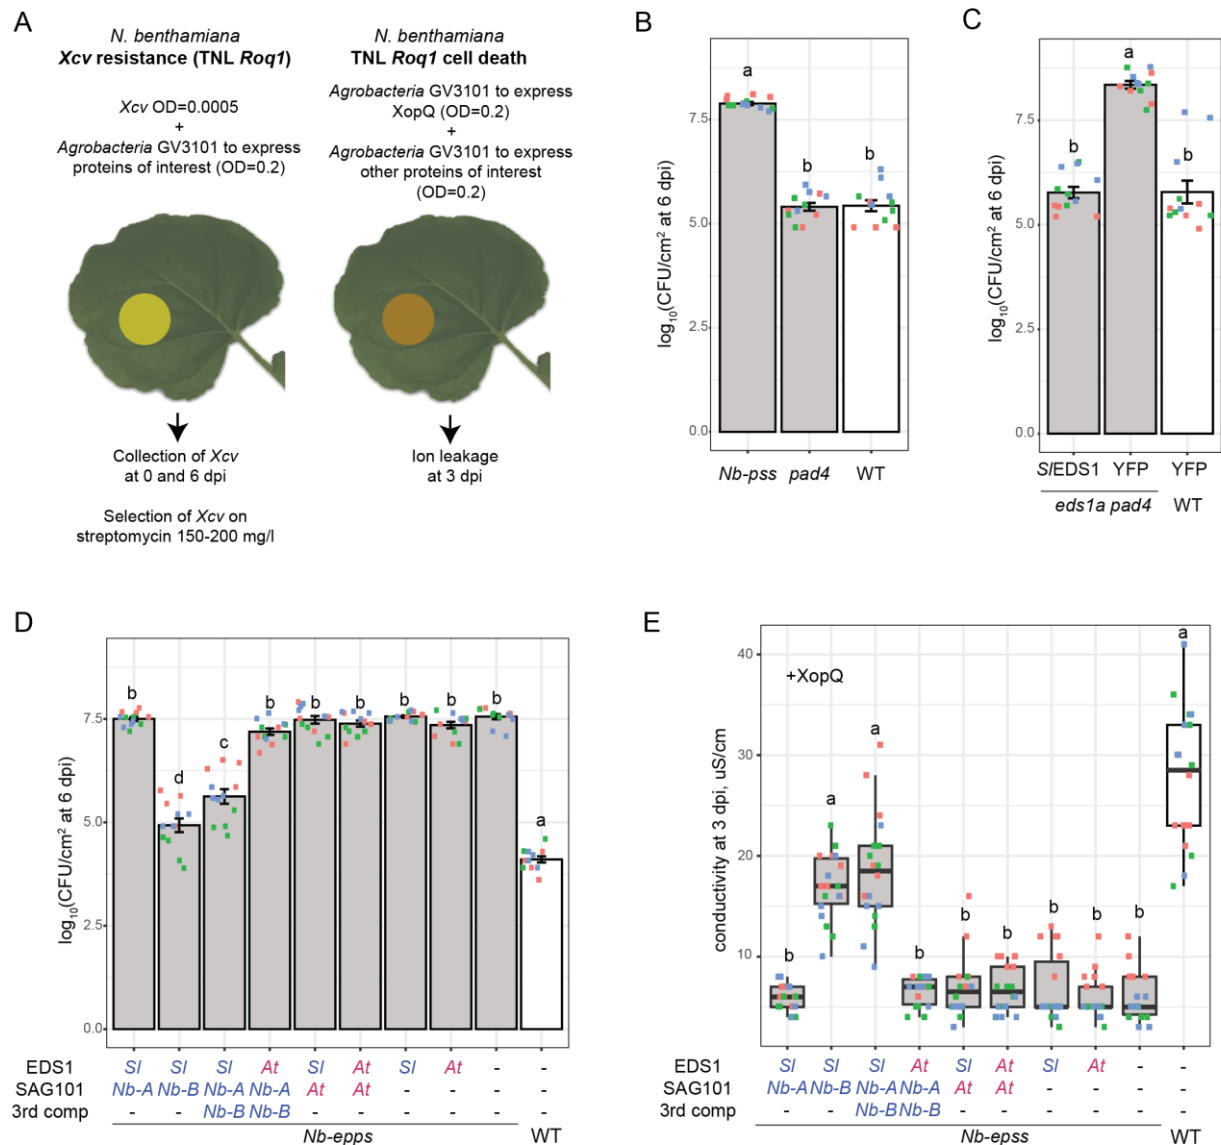

**Tomato or *N. benthamiana* EDS1 signal with *NbSAG101b* in TNL *Roq1* immunity and cell death.**

(A) Schematic showing *N. benthamiana* transient complementation assays to test protein functionalities in *Roq1* immunity at the level of *Xanthomonas campestris* pv. *vesicatoria* (*Xcv*) growth inhibition and XopQ-triggered cell death (see Methods for details).

(B) *N. benthamiana pad4* plants display similar resistance as WT to *Xcv* bacteria at 6 dpi (OD600=0.0005 after coinfiltration with *A. tumefaciens* expressing YFP). By contrast, *Xcv* growth is ~2.5  $\log_{10}$  higher in an *N. benthamiana pad4 sag101a sag101b* (*Nb-pss*) mutant. Dots of the same color on box-plots correspond to technical replicates (individual bacterial extractions) from one of three independent experiments (biological replicates). Genotypes sharing letters above bars do not show statistically significant differences (Tukey's HSD,  $\alpha=0.001$ ,  $n=12$ ). Error bars represent  $\pm$ SEM.

(C) Transient expression of *pAtEDS1:FLAG-SIEDS1* fully complements susceptibility of *N. benthamiana eds1a pad4* plants at the level of *Xcv* growth. Overlapping letter codes above bars show that differences between genotypes are not statistically significant (Tukey's HSD,  $\alpha=0.001$ ,  $n=12$  from three independent experiments used as biological replicates). Error bars represent  $\pm$ SEM.

(D) Complementation of susceptibility in *N. benthamiana eds1a pad4 sag101a sag101b* (*Nb-epsps*) to *Xcv* by transient expression of *pAtEDS1:FLAG-SIEDS1* (*SI*), *35S:NbSAG101a-GFP* (*Nb-A*), *35S:NbSAG101b-GFP* (*Nb-B*), *pAtEDS1:AIEDS1-YFP* (*AI*), *35S:AIAG101-YFP* (*AI*) or *35S:YFP* ("-"), as indicated. Co-expression of FLAG-SIEDS1 and *NbSAG101b-GFP* is sufficient to suppress *Xcv* growth almost to the level of WT plants. No combination with Arabidopsis proteins restored *Xcv* resistance. Dots of the same color in box-plots represent technical replicates (individual extractions of bacteria) in one of three independent experiments (biological replicates). The same letters above bars indicate that differences in means are not statistically significant between genotypes (Tukey's HSD,  $\alpha=0.001$ ,  $n=12$ ). Error bars represent  $\pm$ SEM.

(E) Complementation of *Roq1* cell death triggered by XopQ-myc in *Nb-epsps* plants via transient expression of the same protein combinations as in the panel D. Cell death was measured as an increase in conductivity relative to a YFP negative control (all "-" in sample description). The experiment was repeated three times with six leaf discs used as technical replicates (same colored dots correspond to replicates in each independent experiment used as biological replicate). Statistical significance of differences between samples was assessed using a Nemenyi test with Bonferroni correction for multiple testing ( $\alpha=0.01$ ,  $n=18$ ).

330

331 We infiltrated WT *N. benthamiana*, *Nbpad4* and *Nb-pss* mutant lines with *Xcv* (in the  
 332 presence of *A. tumefaciens*). Whereas WT and *Nbpad4* limited *Xcv* growth, *Nb-pss*  
 333 was susceptible to *Xcv* (Figure 3B), suggesting that one or both *NbSAG101* genes  
 334 are essential whereas *NbPAD4* is dispensable for *Roq1* immunity. Supporting this,

335 susceptibility to *Xcv* infection in the *Nbeds1a pad4* double mutant was converted to  
336 full resistance after *Agrobacteria*-mediated expression of FLAG-*S/EDS1* but not YFP  
337 (Figure 3C). This also shows that FLAG-*S/EDS1* is functional in *N. benthamiana*  
338 *Roq1*-dependent *Xcv* growth restriction. To test activities of *NbSAG101a* or  
339 *NbSAG101b* individually in *Roq1* immunity, an *Nbeds1a pad4 sag101a sag101b*  
340 quadruple mutant (*Nb-epss*) was selected from a cross between *Nbeds1a* with *Nb-*  
341 *pss* (Ordon et al., 2017; Gantner et al., 2019). Transient co-expression of  
342 *NbSAG101b*-GFP but not *NbSAG101a*-GFP with functional FLAG-*S/EDS1* (Figure  
343 3C) restored resistance to *Xcv* growth in *Nb-epss*, although not completely to the  
344 level of WT *N. benthamiana* (Figure 3D). Also, FLAG-*S/EDS1* functioned with  
345 *NbSAG101b*-GFP, but not *NbSAG101a*-GFP, in conferring *Roq1*-dependent cell  
346 death, as quantified in a leaf disc ion leakage assay at 3 dpi of XopQ-myc with the  
347 protein combinations (Figure 3E). Western blot analysis at 2 dpi showed that  
348 *NbSAG101a*-GFP and *NbSAG101b*-GFP accumulated to similar levels in these  
349 assays (Supplemental Figure 3B). We concluded that *NbSAG101b*, but not  
350 *NbSAG101a* or *NbPAD4*, functions together with *S/EDS1* or endogenous *NbEDS1a*  
351 in *N. benthamiana Roq1* immunity.

352

### 353 ***AtEDS1* with *AtSAG101* do not restore TNL *Roq1* signaling in *Nb-epss* leaves**

354 In *N. benthamiana* cell death and resistance assays, we tested whether *AtEDS1*-  
355 *AtSAG101* or the heterologous interacting *S/EDS1-AtSAG101* and non-interacting  
356 *AtEDS1-NbSAG101b* pairs (Supplemental Figure 2A) could substitute for  
357 endogenous *NbEDS1a* and *NbSAG101b* in *Roq1* immunity. None of these EDS1-  
358 SAG101 combinations mediated *Roq1* restriction of *Xcv* bacterial growth at 6 dpi  
359 (Figure 3D) or XopQ-triggered *Roq1* cell death at 3 dpi (Figure 3E) in *Nb-epss*. All  
360 tagged proteins accumulated in these assays, as measured on Western blots at 2 dpi  
361 (Supplemental Figure 3B). Hence, *AtEDS1* and *AtSAG101*, as a homologous pair or  
362 together with functional *NbSAG101b* and *S/EDS1*, are not functional in *Roq1*  
363 signaling. We concluded that the Arabidopsis EDS1-SAG101 heterodimer is inactive  
364 or insufficient for signaling in *TNL Roq1* immunity in *N. benthamiana*.

365



366 ***AtEDS1* and *AtSAG101* with *AtNRG1.1* or *AtNRG1.2* rescue XopQ-triggered cell**  
367 **death in *Nb-epss***

368 *SAG101* and *NRG1* were reported to be absent from monocots and several dicot  
369 species (*Aquilegia coerulea*, *Erythranthe guttata*) (Collier et al., 2011; Wagner et al.,  
370 2013). Because we additionally did not find *SAG101* in conifers and *Caryophyllales*  
371 (Supplemental Table 1), we searched for *NRG1* in these species. Manual reciprocal  
372 BLAST searches in nine genomes and transcriptomes of *Caryophyllales* (six *Silene*  
373 species, spinach, amaranth and quinoa) failed to identify *NRG1* orthologs. Similarly,  
374 an OrthoMCL-derived *NRG1* orthogroup did not contain conifer sequences, whereas  
375 *ADR1* orthologs were detected in the examined conifer and *Caryophyllales* species  
376 (Supplemental Table 1). The strong *SAG101* and *NRG1* co-occurrence signature  
377 combined with *Roq1* dependency on *NbSAG101b* (Figure 3) and *NbNRG1* (Qi et al.,  
378 2018) in *N. benthamiana* ETI, prompted us to test whether *AtNRG1.1* or *AtNRG1.2*  
379 expressed with *AtEDS1-AtSAG101* confer *Xcv* resistance and/or XopQ-triggered cell  
380 death in *N. benthamiana*.

381 Previously, tagged *NbNRG1*, *AtNRG1.1* and *AtNRG1.2* forms or their corresponding  
382 CC domains were shown to elicit cell death upon agroinfiltration of *N. benthamiana*  
383 leaves (Peart et al., 2005; Collier et al., 2011; Wróblewski et al., 2018; Wu et al.,  
384 2018b). Using the quantitative ion leakage assay, we tested whether transiently  
385 expressed *AtNRG1.1* or *AtNRG1.2* controlled by a 35S promoter and either untagged  
386 or fused N- or C-terminally to a StrepII-HA (SH) or eGFP epitope tag induce cell  
387 death in WT and *eds1a pad4* *N. benthamiana* leaves (Supplemental Figure 4). N-  
388 and C-terminally eGFP-tagged *AtNRG1.2* produced a strong, and SH-tagged  
389 *AtNRG1.2* – a weak, cell death response in both backgrounds at 3 dpi (Supplemental  
390 Figure 4A). By contrast, N- and C-terminally eGFP- or SH-tagged *AtNRG1.1*, as well  
391 as non-tagged *AtNRG1.1* or *AtNRG1.2* forms, did not induce cell death in these two  
392 *N. benthamiana* genotypes (Supplemental Figure 4A). Western blot analysis of the  
393 expressed proteins at 2 dpi showed that *AtNRG1.1*-eGFP and *AtNRG1.2*-eGFP  
394 accumulated to similar levels as YFP in both backgrounds (Supplemental Figure 4B).  
395 All eGFP-tagged *AtNRG1.1* and *AtNRG1.2* forms were detected in the cytoplasm  
396 (Supplemental Figure 4C). The data suggest that tagged *AtNRG1.2* but not  
397 *AtNRG1.1* induce cell death independently of *NbEDS1a*, *NbPAD4* and XopQ  
398 activation of TNL *Roq1* in *N. benthamiana*. To avoid possible *AtNRG1* autonomous

399 cell death activity, we used the *At*NRG1.1-SH variant in subsequent TNL *Roq1*  
400 immunity assays, because it was clearly detectable (as two bands) on a Western blot  
401 (Supplemental Figure 4B) and did not elicit cell death in TNL non-triggered *N.*  
402 *benthamiana* leaves, similar to the untagged *At*NRG1.1 and *At*NRG1.2 proteins  
403 (Supplemental Figure 4A).

404

FIGURE 4

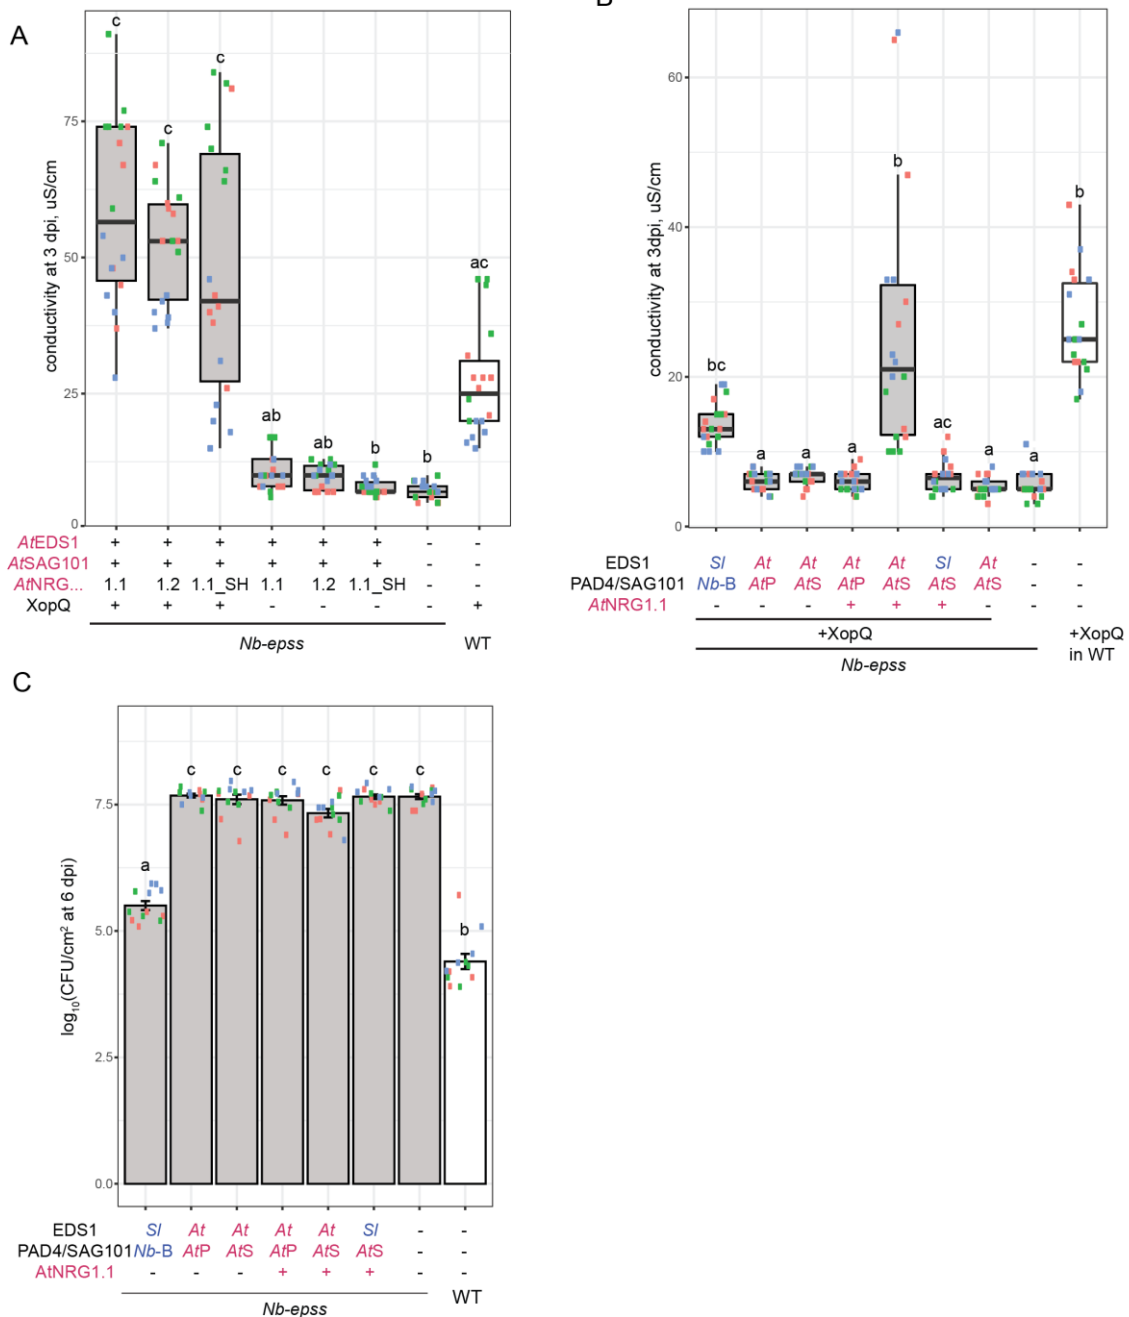

**An A $\epsilon$ EDS1-A $\epsilon$ SAG101-A $\epsilon$ NRG1 module rescues *Roq1*-dependent cell death but not resistance to *Xcv* in *N. benthamiana*.**

(A) Ion leakage in *N. benthamiana* WT and *eds1a pad4 sag101a sag101b* (*Nb-epss*) plants transiently expressing combinations of Arabidopsis EDS1-YFP, SAG101-SH, non-tagged or C-terminally SH-tagged NRG1.1 or NRG1.2 proteins in the presence of *Xcv* effector XopQ-myc ("+" in the sample description refers to YFP). In box-plots, ion leakage is detected in WT plants (white box) at 3 dpi. A XopQ-dependent increase in conductivity was observed in *Nb-epss* samples expressing A $\epsilon$ EDS1 and A $\epsilon$ SAG101 with A $\epsilon$ NRG1.1 or A $\epsilon$ NRG1.2. The experiment was repeated three times (dots of the same color represent six technical replicates (leaf discs) from one independent experiment (biological replicate)). Shared letters above the box-whiskers between samples indicate that differences are not statistically significant (using a Nemenyi test with Bonferroni correction for multiple testing,  $\alpha=0.01$ ,  $n=18$ ).

(B) Ion leakage in *N. benthamiana* WT (white) and *Nb-epss* (gray) plants expressing combinations of A $\epsilon$ EDS1-FLAG with StrepII-HA-AtPAD4 (AtP) or A $\epsilon$ SAG101-SH (AtS) and A $\epsilon$ NRG1.1-SH as indicated, and measured at 3 dpi. "+" in sample descriptions indicates YFP. Expression of XopQ-myc in WT or FLAG-S $\epsilon$ EDS1(SI)/NbSAG101b-GFP (Nb-B) in *Nb-epss* leads serve as controls. SH-AtPAD4 cannot substitute for A $\epsilon$ SAG101-SH in the reconstitution assay. The experiment was repeated three times independently (dots of the same color represent six technical replicates (leaf discs) from one independent experiment (biological replicate)). Statistical analysis was performed with a Nemenyi test, and raw p-values were Bonferroni-corrected for multiple testing ( $\alpha=0.01$ ,  $n=18$ ).

(C) Complementation of *Nb-epss* (gray) susceptibility to *Xcv* growth by transiently expressing combinations of FLAG-S $\epsilon$ EDS1 (SI), A $\epsilon$ EDS1-YFP (At), NbSAG101b-GFP (Nb-B), A $\epsilon$ SAG101-SH, SH-AtPAD4 and A $\epsilon$ NRG1.1-SH (as in the panel B). Expression of FLAG-S $\epsilon$ EDS1/NbSAG101b-GFP partially restores resistance to *Xcv* compared to WT (white) whereas no combination with Arabidopsis proteins reduced *Xcv* growth. The experiment was repeated three times independently (dots of the same color represent four technical replicates (extractions of bacteria) within one independent experiment (biological replicate)). Statistical analysis of *Xcv* titers at 6 dpi used a Tukey's HSD test showing significant differences between means ( $\alpha=0.001$ ,  $N=12$ ) in samples with different letter codes above bars. Error bars represent  $\pm$ SEM.

405

406 Agrobacteria-mediated transient expression of A $\epsilon$ NRG1.1, A $\epsilon$ NRG1.2 or A $\epsilon$ NRG1.1-  
 407 SH together with A $\epsilon$ EDS1-YFP and A $\epsilon$ SAG101-SH (Figure 4, Supplemental Figure 5)  
 408 produced cell death in *Nb-epss* leaves that was as strong as the WT *N. benthamiana*

409 response to XopQ-myc infiltration (Figure 4A). Without XopQ-myc, none of the three  
410 *AtEDS1-AtSAG101-AtNRG1* combinations produced ion leakage above the negative  
411 control (YFP alone) at 3 dpi (Figure 4A), indicating that the cell death response is  
412 XopQ recognition-dependent. Western blot analysis at 2 dpi indicated that *AtNRG1.1-*  
413 *SH*, *AtEDS1-YFP*, *AtSAG101-SH* proteins accumulated to similar levels in XopQ-myc  
414 treated and non-treated leaf extracts (Supplemental Figure 5A). These data show  
415 that *AtEDS1* and *AtSAG101* coexpressed with either *AtNRG1.1* or *AtNRG1.2* can  
416 restore XopQ/*Roq1*-triggered cell death in *Nb-epss* leaves. When *AtSAG101-SH* was  
417 substituted by *SH-AtPAD4* in the assays (Supplemental Figure 5B), this did not  
418 restore *Roq1* cell death (Figure 4B). We concluded that *AtEDS1-AtSAG101-AtNRG1*  
419 but not *AtEDS1-AtPAD4-AtNRG1* reconstitute a TNL cell death signal transduction  
420 module in this *Solanaceae* species. Because *AtEDS1* and *AtSAG101* failed to  
421 function with endogenous *NbNRG1* in triggering *Roq1* cell death (Figure 3E), there  
422 appears to be a requirement for molecular compatibility between these immunity  
423 components within species or clades.

424 Strikingly, neither the *AtEDS1-AtSAG101-AtNRG1.1* nor the *AtEDS1-AtPAD4-*  
425 *AtNRG1.1* combination restored *Roq1* resistance to *Xcv* bacterial growth in *Nb-epss*  
426 infection assays at 6 dpi, in contrast to the *SIEDS1-NbSAG101b* pair (Figure 4C).  
427 Therefore, the *AtEDS1-AtSAG101-AtNRG1.1* cell death module identified here lacks  
428 the capacity to limit *Xcv* growth in *N. benthamiana*. We also concluded that native  
429 *NbEDS1a-NbPAD4* or the trans-clade *AtEDS1-AtPAD4* pairs do not contribute to  
430 *Roq1* restriction of bacteria in these *N. benthamiana* assays (Figure 3B and C, Figure  
431 4C). This contrasts with important roles of *SIEDS1-SIPAD4* and *AtEDS1-AtPAD4*  
432 partners in Arabidopsis TNL (*RPP4*) immunity (Figure 2).

433

FIGURE 5

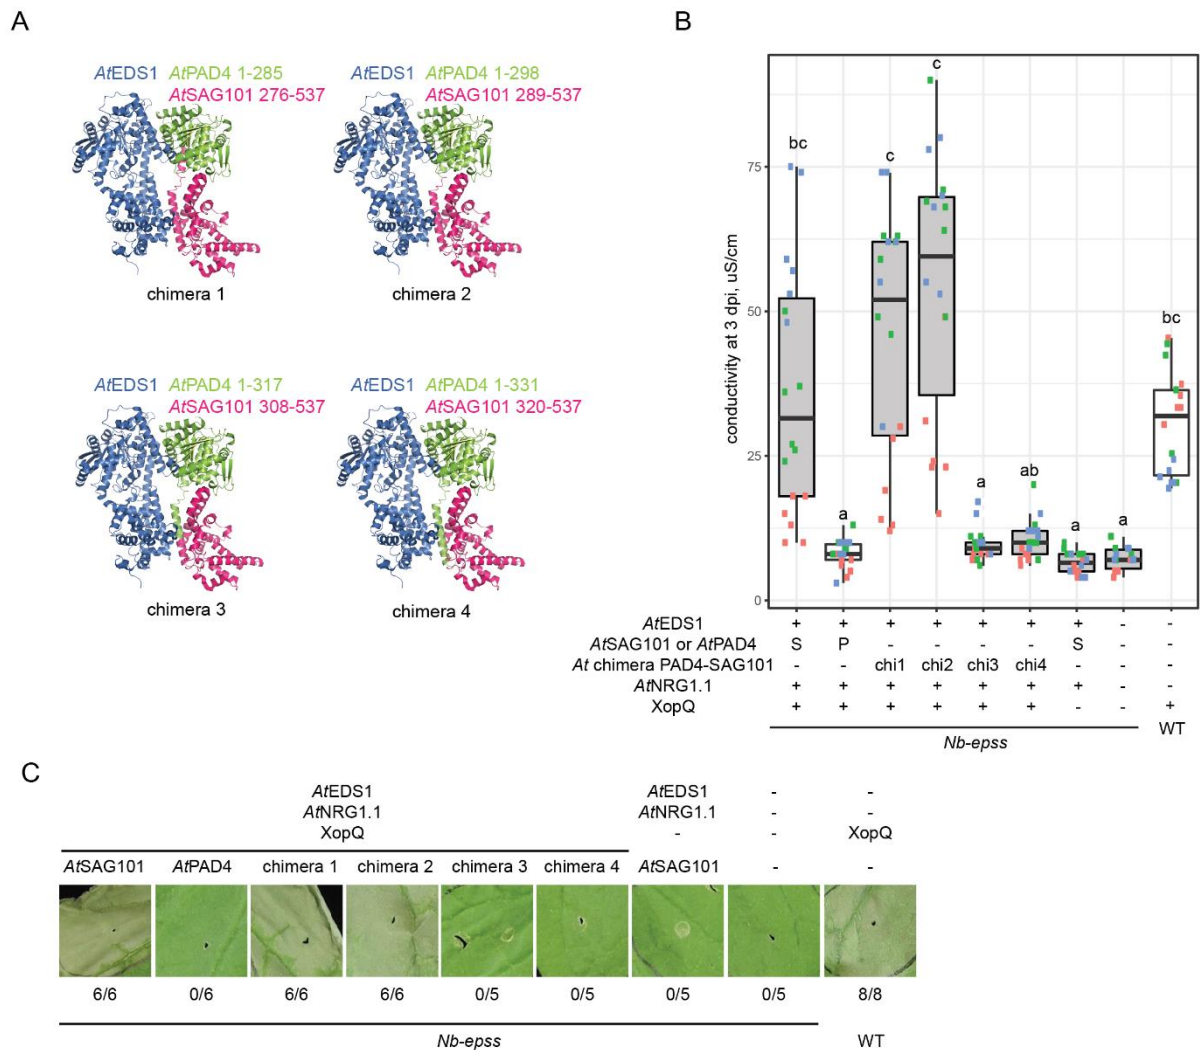

**Differences in the EP domains of AtSAG101 and AtPAD4 determine functionality TNL *Roq1* cell death in *N. benthamiana*.**

(A) Schematic representation of AtPAD4-AtSAG101 chimeras used in assays shown in panels B and C. The AtEDS1-AtSAG101 crystal structure (PDB ID 4nfu) is used as background with AtPAD4 or AtSAG101 portions and amino acid positions shown in green and pink, respectively. AtEDS1 is colored blue.

(B) Ion leakage assay quantifying XopQ-myc triggered cell death in *eds1a pad4 sag101a sag101b* (*Nb-epss*) plants (gray) expressing AtPAD4, AtSAG101 or chimeras (chi1 to chi4, as indicated) with AtEDS1, AtNRG1.1 and XopQ. Cell death in WT (white) in response to XopQ served as a control. The experiment was performed three times (dots of the same color represent six technical replicates (leaf discs) from one independent experiment (biological replicate)). Statistical analysis was performed using a Nemenyi test with Bonferroni correction for multiple testing. Samples with different letters above the box-plots have statistically significant differences in conductivity ( $\alpha=0.01$ ,  $n=18$ ).

(C) Macroscopic cell death symptoms in WT and *Nb-epss* leaf panels at 3 d after agroinfiltration of the protein combinations shown in panel B. In contrast to the ion leakage assays, infiltrated leaves were wrapped in aluminum foil for 2 d and photographs taken at 3 dpi. Numbers under each image indicate necrotic/total infiltrated sites observed in three independent experiments. In (B) and (C), "-" in the infiltration scheme refers to addition of YFP expressing strain of *A. tumefaciens*.

434

435

436 **An EP domain  $\alpha$ -helical coil surface on AtSAG101 confers *Roq1* cell death**

437 The above data suggest that the AtEDS1-AtSAG101 heterodimer has a distinctive  
 438 feature that is not shared by AtEDS1-AtPAD4 ((Wagner et al., 2013), Supplemental  
 439 Figure 1B), which enables cooperation with AtNRG1.1 in XopQ/*Roq1*-dependent cell  
 440 death in *Nb-epss* plants (Figure 4A-C). Several AtEDS1 EP-domain residues lining a  
 441 cavity formed by the heterodimer are essential for AtEDS1-AtPAD4 TNL immunity

442 signaling in Arabidopsis (Bhandari et al., 2019). Here, examining EDS1-PAD4 and  
443 EDS1-SAG101 evolutionary rate variation across seed plants (Supplemental Figure  
444 1B) highlighted conserved residues on a prominent  $\alpha$ -helical coil of *At*PAD4 and  
445 *At*SAG101 that spans the length of the EP-domain cavity and, at its base, creates  
446 contacts with the *At*EDS1 EP domain ((Wagner et al., 2013), Supplemental Figure  
447 1B). We therefore generated four *At*PAD4-*At*SAG101 chimeric proteins (1 to 4) with  
448 decreasing *At*SAG101 contributions to this central EP domain  $\alpha$ -helical coil (Figure 5,  
449 schematic for chimeras in Figure 5A, SAG101 shown in pink). All four *At*PAD4-  
450 *At*SAG101 chimeras contained the complete *At*PAD4 N-terminal lipase-like domain  
451 (Figure 5A, green). In *Nb-epss* cell death assays, chimeras 1 to 4 fused N-terminally  
452 to a StrepII-YFP tag exhibited a nucleocytoplasmic localization, like YFP-*At*PAD4  
453 (Supplemental Figure 6). We tested the chimeras in the *Nb-epss* TNL *Roq1* cell  
454 death reconstitution assay, as before with co-expressed *At*EDS1-YFP, *At*NRG1.1-SH  
455 and XopQ-myc (Figure 5B and 5C). Chimeras 1 and 2 mediated XopQ-dependent  
456 cell death whereas chimeras 3 and 4 were inactive in quantitative ion leakage assays  
457 and macroscopically at 3 dpi (Figure 5B and 5C). All chimeras accumulated to similar  
458 levels but less well than YFP-*At*PAD4 or *At*SAG101-YFP full-length proteins at 2 dpi  
459 (Supplemental Figure 5C). Comparing the sequences of functional and non-  
460 functional chimeras 2 and 3 allowed us to delineate an *At*SAG101  $\alpha$ -helical coil patch  
461 responsible for cell death reconstitution to between amino acids 289-308  
462 (Supplemental Figure 5D). These results suggest that a discrete region of the  
463 *At*SAG101 EP domain is necessary for conferring *Roq1*-dependent cell death.

464

FIGURE 6

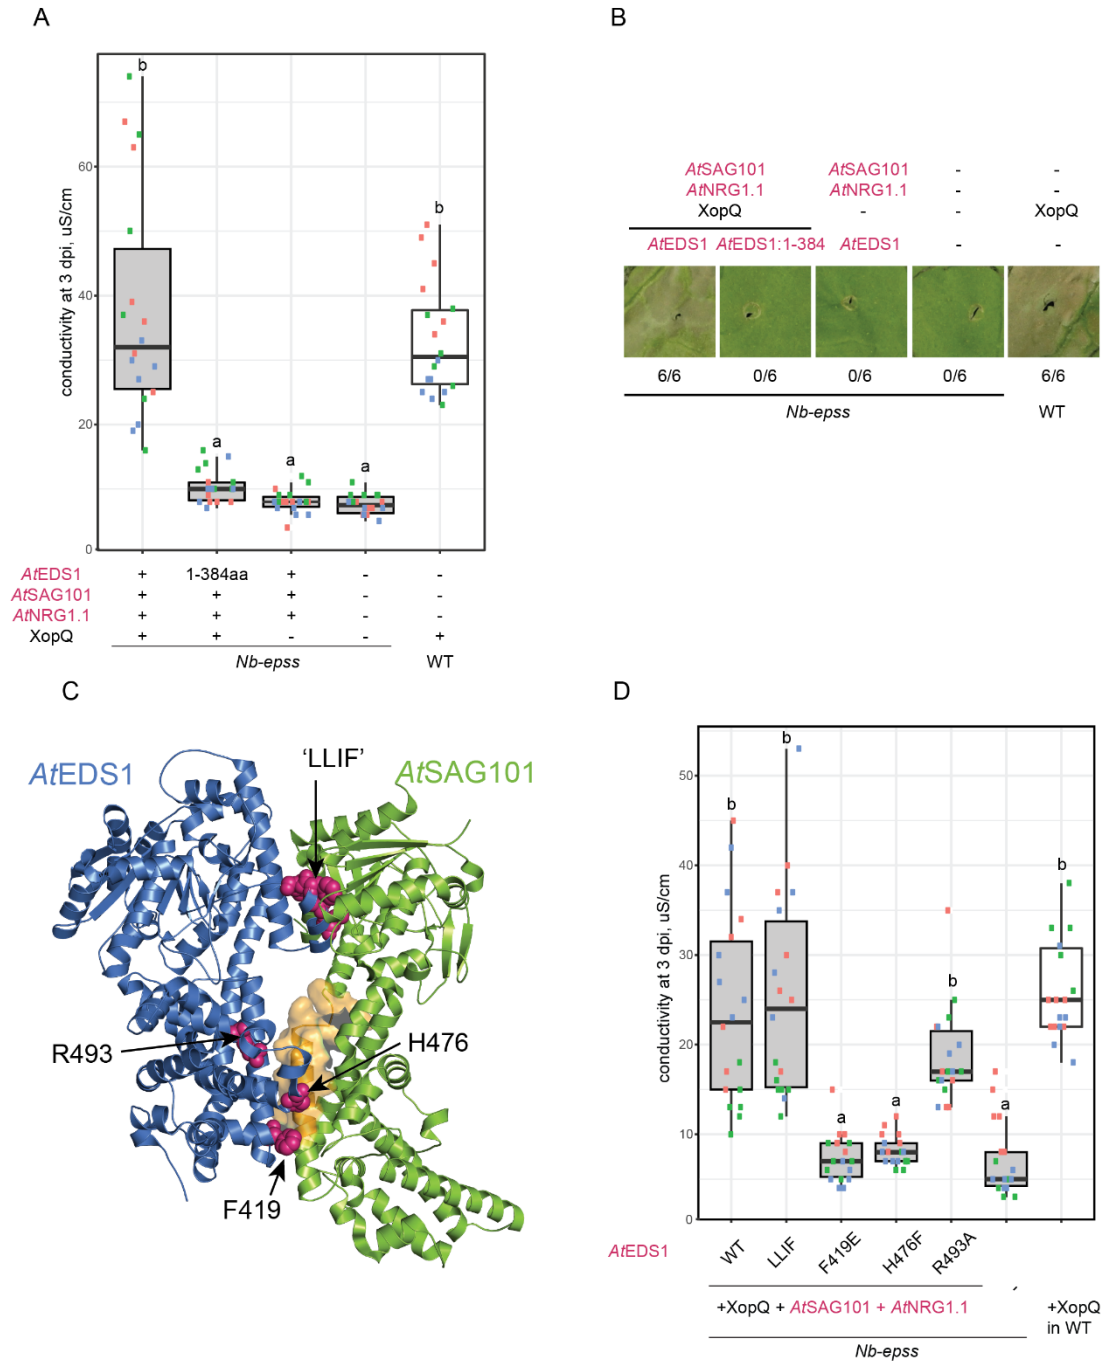

**AIEDS1 EP domain is essential for *N. benthamiana* Roq1 cell death.**

(A) Ion leakage assay for quantifying cell death in *N. benthamiana* WT (white) and *eds1a pad4 sag101a sag101b* (*Nb-epss*) (gray) after infiltration of XopQ-myc with AIEDS1-FLAG (AIEDS1), FLAG-AIEDS1 lipase-like domain (AIEDS1:1-384), AIsAG101-YFP (AIsAG101), AINRG1.1-SH (AINRG1.1) or YFP ("-" in the sample descriptions). Only full-length AIEDS1-FLAG with AIsAG101-YFP and AINRG1.1-SH produces conductivity similar to WT plants infiltrated with XopQ. The experiment was performed three times (dots of the same color represent six technical replicates (leaf discs) in each experiment (biological replicate)). Nemenyi test was applied to test for significance of differences in conductivity (Bonferroni correction for multiple testing,  $\alpha=0.01$  for grouping samples,  $n=18$ ).

(B) Macroscopic cell death symptoms for combinations used in the ion leakage assays in (A). Numbers under each image indicate necrotic/total infiltrated sites observed in three independent experiments.

(C) AIEDS1 amino acids mutated in the structure-function analysis of AIEDS1 activity in the cell death reconstitution assay. AIEDS1 and AIsAG101 are shown as blue and green ribbon diagrams, respectively. Ribbon and sphere depiction of the AIEDS1-AIsAG101 heterodimer crystal structure. Amino acids mutated in this analysis ('LLIF', R493, H476, F419) are displayed as pink spheres. The portion of an AIsAG101 EP domain central  $\alpha$ -helical coil identified as essential for cell death activity in *Nb-epss* reconstitution assays with chimeric AIPAD4-AIsAG101 proteins is represented as an orange surface.

(D) Ion leakage assay quantifying defects of AIEDS1-YFP mutants shown in (C) in *Nb-epss* (gray) reconstituted cell death compared to WT *N. benthamiana* (WT, white) responding to XopQ. Co-expression of AIEDS1-YFP (WT), AIEDS1\_R493A-YFP (R493A) or AIEDS1-LLIF/AAA-YFP (LLIF) with AIsAG101-SH and AINRG1.1-SH produced XopQ-myc dependent ion leakage, whereas mutated AIEDS1-YFP (H476F and F419E) were similar to the negative YFP (-) control. Experiment were performed three times independently (dots of the same color represent six technical replicates (leaf discs) from one independent experiment (biological replicate)). Samples with different letters above the box-plots have statistically significant differences in conductivity ( $\alpha=0.01$ ) after Nemenyi test followed by Bonferroni correction for multiple testing ( $n=18$ ).

465

466

467 **TNL (*Roq1*) cell death in *N. benthamiana* requires the *At*EDS1 EP domain**

468 Next we tested whether the *At*EDS1 EP domain is necessary for XopQ-triggered cell  
469 death in *Nb-epss* (Figure 6, Supplemental Figure 7). Because the EDS1 EP domain  
470 is unstable without its N-terminal lipase-like domain (Wagner et al., 2013), we  
471 compared activities of full-length *At*EDS1-FLAG and the FLAG-*At*EDS1 lipase-like  
472 domain (amino acids 1-384, (Wagner et al., 2013)), which accumulated to similar  
473 levels in *Nb-epss* leaves (Supplemental Figure 7A). The *At*EDS1 lipase-like domain  
474 did not confer XopQ-triggered cell death (Figures 6A and 6B), indicating there is a  
475 requirement for the *At*EDS1 EP domain in reconstituting *N. benthamiana* TNL (*Roq1*)  
476 cell death. We next tested effects of individually mutating two *At*EDS1 EP domain  
477 amino acids F419E and H476F which are on the *At*EDS1 EP domain  $\alpha$ -helical coil  
478 surface closest to the *At*SAG101 patch found to be necessary for *Roq1* cell death  
479 (Figure 6C). Mutations at the *S*EDS1 position F435, which corresponds to *At*EDS1  
480 F419, impaired *S*EDS1 function in *Roq1* cell death (Gantner et al., 2019). Alongside  
481 the two *At*EDS1 mutants, we tested two *At*EDS1 variants that are non-functional in  
482 Arabidopsis TNL immunity: *At*EDS1<sup>LLIF</sup> with weak EDS1-partner N-terminal binding  
483 (Figure 1C, 6C, (Wagner et al., 2013; Cui et al., 2018)), and *At*EDS1<sup>R493A</sup> with  
484 impaired EDS1-PAD4 heterodimer signaling (Bhandari et al., 2019). In the *Nb-epss*  
485 assays, *At*EDS1<sup>F419E</sup> and *At*EDS1<sup>H476F</sup> failed to confer *Roq1* cell death at 3 dpi  
486 whereas *At*EDS1<sup>LLIF</sup> and *At*EDS1<sup>R493A</sup> were functional (Figure 6D). The C-terminally  
487 YFP-tagged variants accumulated to similar or higher levels than WT *At*EDS1-YFP in  
488 *Nb-epss* leaves at 2 dpi (Supplemental Figure 7B). Put together with the *At*PAD4-  
489 *At*SAG101 chimera phenotypes (Figure 5), these data identify aligned parts of the  
490 *At*EDS1 and *At*SAG101 EP domains as being necessary for TNL-triggered cell death  
491 in *N. benthamiana*. Interestingly, the N-terminal ‘LLIF’ contact and EP domain R493  
492 that are required for *At*EDS1-*At*PAD4 basal and TNL immunity in Arabidopsis  
493 (Wagner et al., 2013; Cui et al., 2018; Bhandari et al., 2019) are dispensable for  
494 *At*EDS1-*At*SAG101 cooperation with *At*NRG1.1 in the *Nb-epss* TNL (*Roq1*) cell death  
495 response.

496



FIGURE 7

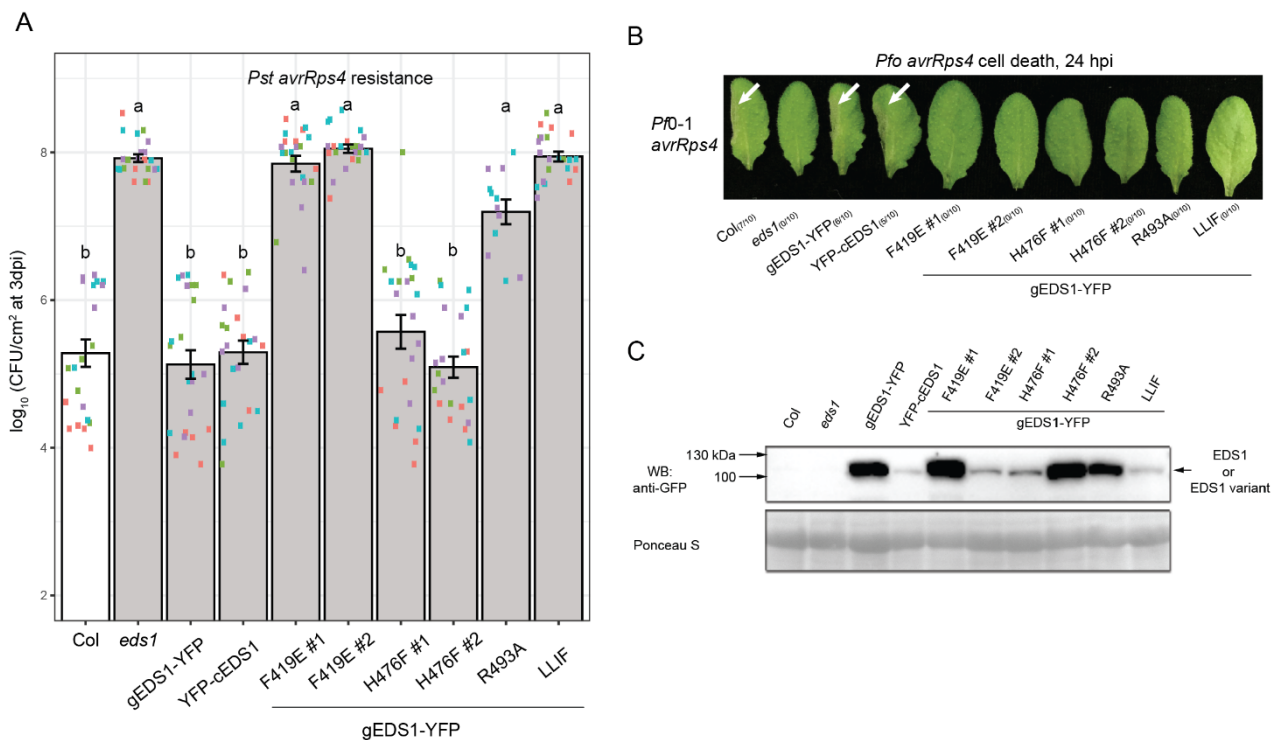

**AtEDS1 variants with mutated lipase-like and EP domains have different defects in Arabidopsis *RRS1S-RPS4* cell death and bacterial growth arrest.**

(A) *Pst avrRps4* titers at 3 dpi (OD<sub>600</sub>=0.0005) in leaves of Arabidopsis Col *eds1-2* (gray) independent homozygous transgenic lines expressing Arabidopsis gEDS1-YFP and corresponding mutant variants (F419E, H476F, R493A, 'LLIF') under control of native *pEDS1* promoter, as indicated. Responses in WT coding (cEDS1) and genomic (gEDS1) *AtEDS1* transgenic (gEDS1-YFP and YFP-cEDS1) lines and Col (white) served as controls. Experiments were performed four times (biological replicates) (and twice for the R493A line) each with five technical replicates (extractions of bacteria). Statistical analysis used Tukey's HSD test and grouping of genotypes by letters at the significance threshold  $\alpha=0.001$  (n=10-20). Error bars represent  $\pm$ SEM.

(B) Macroscopic cell death of Arabidopsis leaves of the same genotypes as used in (A), visible as tissue collapse at 24 h after *Pf0-1 avrRps4* infiltration (OD<sub>600</sub>=0.2). Experiments were repeated three times with similar results. Numbers in parentheses indicate leaves showing visual tissue collapse/infiltrated leaves in one representative experiment. None of the tested *AtEDS1*-YFP mutant variants developed cell death symptoms observed in Col and cEDS1 or gEDS1 transgenic lines.

(C) Western blot analysis of Arabidopsis lines expressing the YFP-tagged WT EDS1 and mutant variants tested in the (A) and (B), prior to pathogen infiltration. The analysis was performed twice independently with similar results. Ponceau S staining of membrane shows equal protein loading.

497

498 **EDS1 EP domain mutants are impaired in Arabidopsis *RRS1S-RPS4* cell death**

499 The above analysis of the *AtEDS1*<sup>F419E</sup> and *AtEDS1*<sup>H476F</sup> mutants revealed  
 500 importance of these EP domain residues with *AtSAG101* and *AtNRG1.1* in *N.*  
 501 *benthamiana* TNL cell death (Figure 6D). We examined, whether the same mutations  
 502 affect Col TNL (*RRS1S-RPS4*) immunity to *Pseudomonas syringae* pv. *tomato*  
 503 DC3000 (*Pst avrRps4*) in Arabidopsis (Figure 7). For this, genomic *AtEDS1*<sup>F419E</sup> and  
 504 *AtEDS1*<sup>H476F</sup> (gEDS1-YFP) constructs were transformed into Col *eds1-2* and two  
 505 independent homozygous transgenic lines expressing EDS1-YFP proteins (#1 and  
 506 #2) selected for each variant (Figure 7A). The lines were infiltrated with *Pst avrRps4*  
 507 alongside WT Col, *eds1-2* and functional gEDS1-YFP or signaling defective  
 508 *AtEDS1*<sup>R493A</sup> and *AtEDS1*<sup>LLIF</sup> controls (Wagner et al., 2013; Cui et al., 2018; Bhandari  
 509 et al., 2019). As expected, *AtEDS1*<sup>R493A</sup> and *AtEDS1*<sup>LLIF</sup> plants failed to restrict *Pst*  
 510 *avrRps4* growth (Figure 7B). *AtEDS1*<sup>F419E</sup> was also fully susceptible but, surprisingly,  
 511 *AtEDS1*<sup>H476F</sup> retained *RRS1S-RPS4* resistance (Figure 7B). We tested the same

512 lines for TNL (*RRS1S-RPS4*) macroscopic cell death at 24 hpi after infiltration of  
513 *Pseudomonas fluorescens* 0-1 (*Pf0-1*) delivering AvrRps4 (Heidrich et al., 2011;  
514 Sohn et al., 2014). Here, all variants (*AtEDS1*<sup>F419E</sup>, *AtEDS1*<sup>H476F</sup>, *AtEDS1*<sup>R493A</sup> and  
515 *AtEDS1*<sup>LLIF</sup>) were defective in cell death (Figure 7C). Therefore, *AtEDS1*<sup>LLIF</sup>,  
516 *AtEDS1*<sup>R493A</sup> and *AtEDS1*<sup>F419E</sup> failed to limit bacterial growth and induce TNL  
517 (*RRS1S-RPS4*) cell death in Arabidopsis, whereas *AtEDS1*<sup>LLIF</sup> and *AtEDS1*<sup>R493A</sup> but  
518 not *AtEDS1*<sup>F419E</sup> retain cell death-inducing activity in *N. benthamiana*. More strikingly,  
519 *AtEDS1*<sup>H476F</sup> was defective in cell death in Arabidopsis and *N. benthamiana* but fully  
520 competent in Arabidopsis TNL resistance to bacteria. Together, these data suggest  
521 that the same *AtEDS1* EP domain surface lining the *AtEDS1-AtPAD4* or *AtEDS1-*  
522 *AtSAG101* cavity controls bacterial TNL resistance and host cell death in Arabidopsis  
523 and *N. benthamiana*, but that EDS1-SAG101 and EDS1-PAD4 EP domain signaling  
524 functions are different.

525

## 526 **Different genetic requirements for cell death and bacterial growth restriction in** 527 **Arabidopsis RRS1/RPS4 immunity**

528 Evidence of *AtEDS1-AtSAG101-AtNRG1* activity and *AtEDS1-AtPAD4-AtNRG1*  
529 inactivity in *N. benthamiana* TNL-triggered cell death (Figure 4, Figure 5) lends  
530 support to engagement of distinct *AtSAG101/AtNRG1* and *AtPAD4/AtADR1* immunity  
531 branches in Arabidopsis TNL signaling, as proposed by (Wu et al., 2018b).

532 To test this, we quantified TNL (*RRS1S-RPS4*) bacterial resistance and cell death  
533 phenotypes in Arabidopsis Col *EDS1*-family single mutants (*eds1-2*, *pad4-1* and  
534 *sag101-3*), a double mutant *pad4-1 sag101-3* and AvrRps4 non-recognizing mutant  
535 *rrs1a rrs1b* (Saucet et al., 2015), together with a CRISPR-associated 9 (Cas9)  
536 generated Col *AtNRG1.1 AtNRG1.2* double mutant line *nrg1.1 nrg1.2* (denoted *n2*)  
537 (Figure 8, Supplemental Figure 8; mutations introduced in *n2* shown in Supplemental  
538 Figure 8A). Different Arabidopsis TNLs exhibited varying genetic dependencies on  
539 *NRG1*- and *ADR1*-family genes (Castel et al., 2018; Wu et al., 2018b). Also, *NRG1*  
540 and *ADR1* orthologs share a phylogenetically distinct nucleotide-binding domains  
541 (Supplemental Figure 8B, (Collier et al., 2011; Shao et al., 2016)). We therefore also  
542 generated a pentuple *nrg1.1 nrg1.2 adr1 adr1-L1 adr1-L2* mutant (denoted *n2a3*) by

543 transforming the *AtNRG1.1/AtNRG1.2* Cas9 mutagenesis construct into an *adr1*  
 544 *adr1-L1 adr1-L2* triple mutant (*a3*) (Supplemental Figure 8A, (Bonardi et al., 2011)).

FIGURE 8

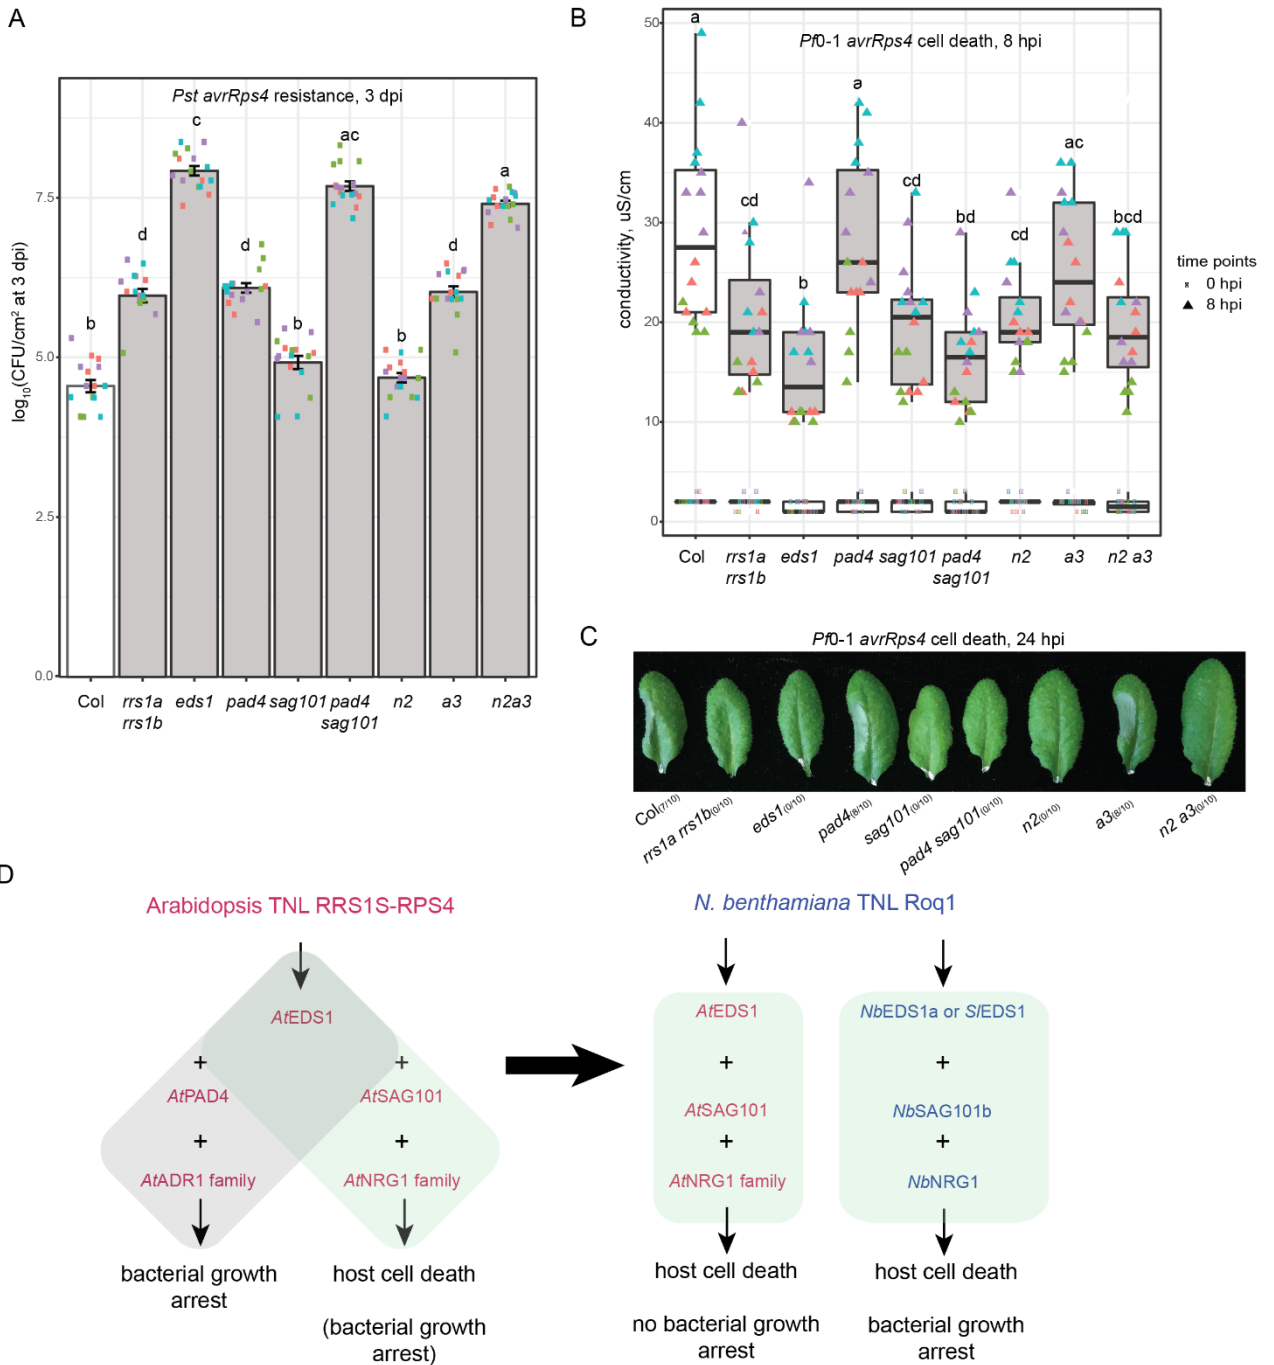

**Differential requirements for *EDS1*-, *NRG1*- and *ADR1*-family genes in Arabidopsis *RRS1S-RPS4* cell death and bacterial growth arrest.**

(A) *Pst avrRps4* titers at 3 dpi (OD600=0.0005) in leaves of Arabidopsis Col (white) and single or combinatorial mutants lines, as indicated. Experiments were performed four times independently (dots with the same colors represent technical replicates (extractions of bacteria) within the same experiment (biological replicate)). Letters above bars correspond to statistical grouping after a Tukey's HSD test ( $\alpha=0.001$ ,  $n=16$ ). Error bars represent  $\pm$ SEM.

(B) Ion leakage assay quantifying *Pfl-1 avrRps4* (OD600=0.2) cell death (at 8 hpi) in the Arabidopsis genotypes tested in (A). The experiment was repeated four times independently (dots with the same color represent four technical replicates (leaf discs) in one experiment (biological replicate)). Samples with overlapping letter codes above the whisker-boxes do not show statistically significant differences (Tukey's HSD,  $\alpha=0.001$ ,  $n=16$ ).

(C) Macroscopic cell death symptoms, visible as tissue collapse at 24 h after infiltration of *Pfl-1 avrRps4* (OD600=0.2) into leaves of the Arabidopsis lines tested in (A). Numbers in parentheses represent leaves showing tissue collapse/total infiltrated leaves in one experiment. One experiment is shown as representative of three independent experiments.

(D) Schematic showing cooperation between EDS1-family proteins and ADR1 or NRG1 helper NLRs in Arabidopsis and *N. benthamiana* TNL immune responses tested in this study. In Arabidopsis, RRS1S-RPS4 recognition of AvrRps4 in ETI bolsters EDS1-PAD4-ADR1 immune responses leading to restriction of *Pst avrRps4*. A different RRS1S-RPS4 ETI pathway mediated by EDS1-SAG101-NRG1 promotes host cell death but these components are dispensable for limiting bacterial growth if the EDS1-PAD4-ADR1 branch is operational. A complete Arabidopsis TNL immune response requires cooperation between the two branches. In *N. benthamiana*, TNL Roq1-conditioned bacterial (*Xcv*) growth arrest and cell death are channeled through the EDS1-SAG101-NRG1 signaling module and therefore do not require EDS1-PAD4. Cross-clade transfer of a compatible Arabidopsis EDS1-SAG101-NRG1 module is sufficient to signal Roq1 cell death but not resistance to *Xcv* growth. This recapitulates the cell death-promoting functions of *AtSAG101*, *AtNRG1.1* and *AtNRG1.2* and their rather weak contributions to bacterial restriction in Arabidopsis.

545

546 At the level of *Pst avrRps4* growth at 3 dpi, the *sag101* and *n2* mutants exhibited WT  
547 Col resistance (Figure 8A). The *pad4* and *a3* mutants partially restricted bacterial  
548 growth, phenocopying *rrs1a rrs1b*, whereas *eds1*, *pad4 sag101* and *n2a3* mutants  
549 were highly susceptible to *Pst avrRps4* (Figure 8A). These data show that *AtADR1*-  
550 family genes, like *AtPAD4* (Feys et al., 2005; Wagner et al., 2013), genetically  
551 compensate for loss of *AtSAG101* or *AtNRG1* functions in *RRS1S-RPS4* immunity  
552 and show that combined loss of the *ADR1*- and *NRG1*- helper NLR family functions,  
553 like loss of *PAD4* and *SAG101* together, produce a completely defective TNL/EDS1  
554 bacterial immune response.

555 We measured TNL (*RRS1S-RPS4*) cell death phenotypes in the same panel of  
556 mutants after infiltration with *Pf0-1 avrRps4* bacteria by monitoring ion leakage at 8  
557 hpi (Figure 8B) and macroscopic cell death at 24 hpi (Figure 8C). Host cell death was  
558 strongly reduced in *eds1* indicating it is *EDS1*-dependent (Heidrich et al., 2011; Sohn  
559 et al., 2014). The *pad4* and *a3* mutants exhibited a similar level of tissue collapse and  
560 ion leakage as WT Col (Figure 8B and 8C) and therefore are not essential  
561 components of TNL (*RRS1S-RPS4*) cell death. The *sag101* and *n2* mutants  
562 phenocopied *rrs1a rrs1b* with an intermediate cell death response (Figure 8B and  
563 8C). The *pad4 sag101* double and *n2a3* pentuple mutants phenocopied *eds1-2*  
564 (Figures 8B and 8C), indicating complete loss of *EDS1*-dependent host cell death  
565 when combined activities of *AtNRG1*- with *AtADR1*-family, or *AtPAD4* with *AtSAG101*  
566 are lost. When compared with the *Pst avrRps4* growth phenotypes (Figure 8A), these  
567 demarcations between cell death-competent and cell death-compromised lines  
568 (Figure 8B and C) point to a major role of *AtNRG1.1* and *AtNRG1.2* proteins with  
569 *SAG101* in promoting TNL/EDS1 cell death in Arabidopsis and that this is  
570 dispensable for limiting bacterial growth when *PAD4* and *ADR1*-family functions are  
571 intact. By contrast, *EDS1/PAD4*, likely together with *ADR1*-family proteins, have a  
572 major role in limiting bacterial growth in Arabidopsis TNL (*RRS1S-RPS4*) immunity  
573 but are dispensable for host cell death.

574

## 575 Discussion

576 In dicotyledonous species, activated intracellular TNL receptors converge on the non-  
577 NLR lipase-like protein EDS1, which transduces signals to downstream defense and  
578 cell death pathways to stop pathogen growth (Wiermer et al., 2005; Adlung et al.,  
579 2016; Qi et al., 2018; Gantner et al., 2019). In Arabidopsis, *AtEDS1* functions in a  
580 heterodimer with one of its partners, *AtPAD4*, to transcriptionally mobilize anti-  
581 microbial defense pathways and bolster SA-dependent programs that are important  
582 for basal and systemic immunity (Rietz et al., 2011; Wagner et al., 2013; Cui et al.,  
583 2017; Bhandari et al., 2019). *AtEDS1-AtPAD4* mediated signaling is sufficient for  
584 basal immunity to bacterial and oomycete pathogens and for ETI initiated by many  
585 TNL receptors (Wiermer et al., 2005). The function of *AtEDS1* heterodimers with its  
586 second partner, *AtSAG101*, was not determined (Rietz et al., 2011; Xu et al., 2015).  
587 We show here that *AtEDS1* functions together with *AtSAG101* and *AtNRG1* helper  
588 CNL proteins as a coevolved host cell death signaling module in TNL (*RRS1S-RPS4*)  
589 ETI (Figure 8D). We provide genetic and molecular evidence that *AtEDS1*-  
590 *AtSAG101-AtNRG1* promote TNL-dependent cell death in their native Arabidopsis  
591 (Figure 8B and C) and in a solanaceous species, *N. benthamiana* (Figure 4A). In  
592 both systems, the cell death activity cannot be substituted by *AtEDS1* with *AtPAD4*  
593 (Figure 4B, Figure 5). We establish that *AtSAG101* and *AtNRG1.1/AtNRG1.2* also  
594 contribute to Arabidopsis TNL (*RRS1S-RPS4*) restriction of *Pst avrRps4* bacterial  
595 growth in the absence of *AtPAD4* and *AtADR1*-family (Figure 8A). By contrast, in an  
596 *N. benthamiana* TNL (*Roq1*) reconstitution assay, the *AtEDS1-AtSAG101-AtNRG1.1*  
597 module confers cell death (Figure 4B) but is inactive or insufficient for limiting *Xcv*  
598 bacterial growth (Figure 4C), suggesting there is a functional mismatch or  
599 incompatibility between these proteins and *N. benthamiana* immunity factors. Our  
600 analysis of EDS1-family evolutionary rate variation (Supplemental Figure 1B) coupled  
601 with resistance/cell death phenotyping of targeted *AtEDS1* and *AtSAG101* protein  
602 variants (Figure 3D and E, Figure 4 and 5) provide additional evidence that EDS1-  
603 SAG101 have coevolved with NRG1 to promote TNL cell death and a structural basis  
604 (Figures 5-7) for understanding functionally distinct EDS1-SAG101 and EDS1-PAD4  
605 branches in TNL immunity signaling (Figure 8D).

606

607 A motivation for this study was to explore EDS1-family variation between different  
608 plant lineages in order to identify constraints that might influence protein functionality  
609 between distant clades. For this, we first performed a large-scale phylogenetic  
610 analysis of EDS1-family orthologs across 46 seed plant species (Figure 1A,  
611 Supplemental Figure 1A, Supplemental Table 1, Supplemental Datasets 5-7). This  
612 identified well-supported, phylogenetic groups for EDS1, PAD4 and SAG101 protein-  
613 coding sequences in *Brassicaceae* and *Solanaceae*, and for EDS1 and PAD4 in  
614 *Poaceae*, *Pinacea* (conifers) and *Caryophyllales*, which lack *SAG101* genes  
615 (Supplemental Table 1). This analysis places origins of the EDS1-family deeper in  
616 the evolutionary history of seed plants and not only angiosperms (Wagner et al.,  
617 2013). While *EDS1* and *PAD4* are present in the majority of seed plants, *SAG101*  
618 has experienced dynamic evolution via loss in flowering plants (Supplemental Table  
619 1). It is unclear whether *SAG101* emerged only in flowering plants or existed earlier in  
620 a common ancestor of seed plants. Since *TNL* genes exist in seed plant species  
621 without *SAG101* and *NRG1*, as in conifers (Supplemental Table 1, (Meyers et al.,  
622 2002)) and in non-seed plants without an entire EDS1-family (Gao et al., 2018), it is  
623 possible that some TNLs signal without *SAG101* and *NRG1*. Indeed, TNL Roq1  
624 functioned in effector XopQ-dependent cell death in *Beta vulgaris* (Schultink et al.,  
625 2017) which does not have recognizable *SAG101* or *NRG1* genes (Supplemental  
626 Table 1). Identification of conserved regions in EDS1, PAD4 and SAG101  
627 (Supplemental Figure 1B) close to the EP-domain interaction surfaces and at the  
628 'LLIF'  $\alpha$ -helix (Supplemental Figure 1C) promoting EDS1-family hetero-dimerization  
629 (Wagner et al., 2013) suggested molecular possibilities for physical interactions  
630 between proteins from different taxonomic groups. Testing of EDS1 partner  
631 interactions within and between the angiosperm families *Brassicaceae*, *Solanaceae*  
632 and *Poaceae* (Figure 1B, Supplemental Figure 2A) showed conserved within-species  
633 or -clade partner associations but certain barriers to EDS1 heterodimer formation  
634 between groups.

635  
636 Two recent studies of TNL and CNL receptor signaling in *Arabidopsis* show that TNL  
637 receptors utilize genetically redundant *ADR1* (*ADR1*, *ADR1-L1* and *ADR1-L2*) and  
638 *NRG1* (*NRG1.1*, *NRG1.2*) helper NLR families to different extents for immunity  
639 (Castel et al., 2018; Wu et al., 2018b). These and earlier reports (Bonardi et al.,  
640 2011; Dong et al., 2016) provide evidence that *Arabidopsis* *ADR1* and *NRG1*

641 proteins work as parallel branches downstream of TNL activation. Genetic data  
642 supported *AtADR1s* and *AtPAD4* operating in the same *EDS1*-controlled pathway to  
643 bolster SA and/or other transcriptional defenses, whereas *AtNRG1s* were important  
644 for promoting host cell death (Bonardi et al., 2011; Dong et al., 2016; Castel et al.,  
645 2018; Wu et al., 2018b). Several tested Arabidopsis TNLs recognizing oomycete  
646 pathogen strains, a TNL autoimmune allele of Suppressor of Npr1-1, Constitutive1  
647 (*SNC1*) and a TNL pair *CHS3/CSA1* displayed varying dependence on *AtNRG1*  
648 signaling in immunity (Castel et al., 2018; Wu et al., 2018b). By contrast, all so far  
649 tested TNL pathogen resistance and cell death responses in *N. benthamiana*  
650 signaled via *NbEDS1a*, *NbNRG1* and *NbSAG101b*, but did not require *NbPAD4*  
651 (Adlung et al., 2016; Qi et al., 2018; Gantner et al., 2019). Similarly, we find a  
652 dependency of TNL (*Rog1*) immunity and cell death responses to *Xcv* bacteria on  
653 *NbEDS1a* and *NbSAG101b* but not *NbPAD4* (Figure 3). Collectively, these data  
654 suggest that while there is TNL signaling pathway choice in Arabidopsis, a strong  
655 pathway preference exists in *N. benthamiana* for *EDS1* with *NRG1* and *SAG101*.

656

657 Further support for a TNL two-branched resistance signaling model in Figure 8D  
658 comes from quantifying Arabidopsis TNL (*RRS1S-RPS4*) *Pst avrRps4* growth and  
659 *Pf0-1 avrRps4* cell death phenotypes in *ADR1*-family triple (*a3*) (Bonardi et al., 2011),  
660 double *nrg1.1 nrg1.2 (n2)* and a combined (pentuple) *n2a3* mutant, alongside *EDS1*-  
661 family mutants (Figure 8A-C). Importantly, effects of *pad4* and *sag101* single  
662 mutations on Arabidopsis *RRS1S-RPS4* resistance and cell death responses were,  
663 respectively, phenocopied by the *a3 (adr1 triple)* and *n2 (nrg1.1 nrg1.2)* mutants  
664 (Figure 8A-C). Proposed *PAD4-ADR1* and *SAG101-NRG1* co-functions in bacterial  
665 immunity (Figure 8D) is in line with Arabidopsis *NRG1*-like genes regulating *SAG101*-  
666 dependent *chs3-2d* autoimmunity (Xu et al., 2015; Wu et al., 2018b) and *ADR1*-like  
667 genes regulating *PAD4*-dependent *snc1* autoimmunity (Zhang et al., 2003; Dong et  
668 al., 2016). The Arabidopsis TNL (*RRS1S-RPS4*) phenotypic outputs measured here  
669 show that each branch contributes to a complete *EDS1*-dependent immune response  
670 (Figure 8A and 8B), pointing to synergistic activities and hence a degree of cross-talk  
671 between the two immunity arms, as proposed for Arabidopsis *snc1* autoimmunity (Wu  
672 et al., 2018b).

673

674 Our data further suggest that making a clean distinction between  
675 *AtEDS1/AtNRG1/AtSAG101*-controlled cell death and *AtADR1/AtPAD4*-mediated  
676 transcriptional promotion of 'basal' defenses is not justified, since *AtPAD4* and  
677 *AtADR1s* accounted for a small but measurable portion of the *EDS1*-dependent  
678 *RRS1S-RPS4* cell death (Figure 8B). *AtSAG101* and *AtNRG1* contributions to  
679 Arabidopsis transcriptional reprogramming are not known, but in *N. benthamiana*,  
680 TNL (*Roq1*) *EDS1*-dependent cell death and bacterial resistance were abolished by  
681 mutations in *SAG101b* (Figure 3, (Gantner et al., 2019)) and *NRG1* (Qi et al., 2018).  
682 Interestingly, *Roq1*-dependent transcriptional reprogramming was almost entirely  
683 dependent on *EDS1a* and largely dependent on *NRG1* (Qi et al., 2018), suggesting  
684 that other minor *EDS1*-dependent pathways are at play in *Roq1* immunity. Since  
685 *Roq1* mediates XopQ-triggered cell death in *Beta vulgaris* (Schultink et al., 2017)  
686 which does not have detectable *SAG101* or *NRG1* orthologs (Supplemental Table 1),  
687 this TNL might have a capacity to function via a non-*SAG101/NRG1* branch.  
688 Therefore, it will be of interest to test whether *PAD4* and *ADR1* are responsible for a  
689 set of transcriptional outputs in *N. benthamiana* TNL responses.

690  
691 It is significant that *SIEDS1*, although not contributing with *SIPAD4* or *NbPAD4* to  
692 TNL (*Roq1*)-triggered *Xcv* resistance or cell death in *N. benthamiana* (Figure 3,  
693 (Gantner et al., 2019)), is functional in TNL (*RPP4*) resistance against an oomycete  
694 pathogen (*Hpa Emwa1*), when transferred to Arabidopsis (Figure 2B). Thus, *SIEDS1*-  
695 *SIPAD4* retains an immunity activity. We presume this function is required for some  
696 pathogen encounters in *Solanaceae* hosts and speculate that the *SIEDS1-SIPAD4*  
697 resistance activity in Arabidopsis reflects a core basal immunity transcriptional  
698 reprogramming function that is sufficient for *RPP4* ETI (Cui et al., 2017; Bhandari et  
699 al., 2019). Because *AtEDS1-AtPAD4* heterodimers utilize the same EP domain  
700 surface (involving R493) for bacterial resistance conferred by a TNL (*RRS1S-RPS4*)  
701 and a CNL receptor *RPS2* (Bhandari et al., 2019), it is possible that the maintenance  
702 of *EDS1* and *PAD4* genes across seed plants (Supplemental Table 1) also reflects  
703 their usage by certain CNLs, which can be masked by compensatory defense  
704 pathways. Indeed, the SA immunity branch works in parallel to *EDS1/PAD4* in  
705 Arabidopsis CNL (*RPS2*) immunity (Venugopal et al., 2009; Cui et al., 2017; Mine et  
706 al., 2018).

707



708 In contrast to *S/EDS1-S/PAD4* transferable function to Arabidopsis TNL immunity  
709 (Figure 2B), the *AtEDS1-AtSAG101* heterodimer was not active in *N. benthamiana*  
710 TNL (*Roq1*) cell death unless co-expressed with *AtNRG1.1* or *AtNRG1.2* (Figure 4A).  
711 Also, interaction between *S/EDS1* and *AtSAG101* (Supplemental Figure 2A) was  
712 insufficient to mediate *Roq1* signaling with otherwise functional *AtNRG1.1* or  
713 *NbNRG1* proteins (Figures 3D and E, 4B and C). Hence, between-clade barriers  
714 exist beyond heterodimer formation for *AtEDS1-AtSAG101* and *AtEDS1-AtPAD4*  
715 (Figure 1B and C, Supplemental Figure 2A). These findings highlight a requirement  
716 for matching Arabidopsis proteins to constitute a functional EDS1-SAG101-NRG1  
717 signal transduction module. The data also point to coevolutionary constraints existing  
718 not only on variable NLR receptor complexes (Concepcion et al., 2018; Schultink et  
719 al., 2019) but also on more conserved immunity signaling nodes.

720

721 The EDS1 structure-guided analyses done here (Figures 5-7) and by (Gantner et al.,  
722 2019) show that a conserved EDS1 EP domain signaling surface is necessary for  
723 TNL cell death in Arabidopsis and *N. benthamiana*. The same EP domain surface is  
724 required for rapid mobilization of transcriptional defenses and restriction of bacterial  
725 growth in Arabidopsis *RRS1S-RPS4* ETI (Bhandari et al., 2019). Surprisingly, two  
726 *AtEDS1* variants, *AtEDS1<sup>LLIF</sup>* and *AtEDS1<sup>R493A</sup>*, that are defective in Arabidopsis  
727 *RRS1S-RPS4* bacterial resistance and cell death (Figure 7), were functional in the  
728 reconstituted *N. benthamiana Roq1* cell death assay (Figure 6D). These difference  
729 might be due to a requirement in Arabidopsis for *AtEDS1<sup>LLIF</sup>* and *AtEDS1<sup>R493A</sup>* (with  
730 *AtPAD4*) to transcriptionally regulate their own expression and the expression of  
731 important immunity components (Cui et al., 2018; Bhandari et al., 2019). That  
732 transcriptional role is dispensed with in the *N. benthamiana Roq1* assay, because  
733 *AtEDS1*, *AtSAG101* and *AtNRG1* proteins are transiently overexpressed. In the  
734 future, it will be interesting to examine whether failure of *AtPAD4* to signal in *N.*  
735 *benthamiana* TNL *Roq1* resistance or cell death (Figure 3D and E) is down to the  
736 transient assay used or to mismatches with other *N. benthamiana* immunity  
737 components. These data reinforce the notion that there are striking functional  
738 distinctions between *AtPAD4* and *AtSAG101* in TNL/EDS1 signaling, as indicated by  
739 the *AtPAD4-AtSAG101* chimeras, which identify a specific portion of the *AtSAG101*  
740 EP domain conferring cell death activity in *N. benthamiana Roq1* responses (Figure  
741 5).

742

743 With identification of an EP domain surface at the EDS1-SAG101 heterodimer cavity  
744 that is important for TNL-dependent cell death (Figures 5-7, (Gantner et al., 2019)), it  
745 is tempting to speculate that the Arabidopsis EDS1-SAG101 heterodimer forms a  
746 complex with AtNRG1.1 or AtNRG1.2 to transmit TNL receptor activation to cell  
747 death pathways. We have considered whether this model is supported by our data.  
748 First, mutation of the AtEDS1 'LLIF' H  $\alpha$ -helix, which strongly reduces AtEDS1-  
749 AtSAG101 dimerization (Wagner et al., 2013; Cui et al., 2018), did not disable *Roq1*  
750 reconstituted cell death in *Nb-epss* plants (Figure 6D). Here, we cannot rule out that  
751 partial impairment of EDS1<sup>LLIF</sup>-SAG101 heterodimerization is compensated for by  
752 protein overexpression in the *N. benthamiana* transient assays. Second, the  
753 subcellular localizations of transiently expressed AtSAG101 and AtNRG1 proteins  
754 tested in our *N. benthamiana* assays show that AtSAG101 is mainly nuclear  
755 (Supplemental Figure 2B), as observed in Arabidopsis upon transient expression  
756 (Feys et al., 2005). By contrast, N- and C-terminally GFP-tagged AtNRG1.1 and  
757 AtNRG1.2 isoforms are cytoplasmic (Supplemental Figure 5C). A cytoplasmic  
758 endomembrane accumulation pattern was also in Arabidopsis stable transgenic lines  
759 and *N. benthamiana* transient assays for functional AtNRG1-mNeonGreen isoforms,  
760 which did not obviously change upon TNL activation (Wu et al., 2018b). These data  
761 are difficult to reconcile with direct interaction between AtEDS1-AtSAG101 and  
762 AtNRG1 underlying co-functions, although there might exist a small overlapping pool  
763 of these proteins that confers a cell death activity. In this regard, it is notable that a  
764 cytoplasmic AvrRps4 pool was found to elicit *EDS1*-dependent cell death in  
765 Arabidopsis *RRS1S-RPS4* immunity (Heidrich et al., 2011). *NbNRG1* was reported to  
766 interact directly with *NbEDS1a* (Qi et al., 2018), implying a molecular link between  
767 these immunity signaling components.

768

## 769 **Methods**

### 770 **Plant materials and plant growth conditions**

771 *Arabidopsis* (*Arabidopsis thaliana* L. Heynh.) Col-0 (Col) mutants *eds1-2*, *pad4-1*,  
772 *sag101-3*, *pad4-1 sag101-3*, *eds1-2 pad4-1 sag101-1* were described previously  
773 (Glazebrook et al., 1997; Feys et al., 2005; Bartsch et al., 2006; Wagner et al., 2013;  
774 Cui et al., 2018). The mutant *eds1-2 pad4-1 sag101-3* was selected from a  
775 segregating F2 population *eds1-2 pad4-1* x *sag101-3* (Cui et al., 2018). The Col *adr1*  
776 *adr1-L1 adr1-L2* triple mutant was kindly provided by J. Dangl (Bonardi et al., 2011).  
777 *Nicotiana benthamiana* mutants *eds1a*, *eds1a pad4*, *pad4 sag101a sag101b* are  
778 described in (Ordon et al., 2017; Gantner et al., 2019). The quadruple *N.*  
779 *benthamiana eds1a pad4 sag101a sag101b* mutant was selected from a cross  
780 between *eds1a* and *pad4 sag101a sag101b* mutants (Gantner et al., 2019).  
781 Genotyping was performed with Phire polymerase (F124, Thermo Fisher Scientific)  
782 on DNA extracted with the sucrose or Edwards methods (Berendzen et al., 2005).  
783 Oligonucleotides for genotyping are provided in the Supplemental Table 3.  
784 *Arabidopsis* homozygous transgenic Col *eds1-2* lines expressing Col coding (c) and  
785 genomic (g) *AtEDS1* sequence (*pEN pAtEDS1:YFP-cAtEDS1*, *pXCG*  
786 *pAtEDS1:gAtEDS1-YFP*, *pAtEDS1:gAtEDS1<sup>LLIF</sup>-YFP*, *pAtEDS1:gAtEDS1<sup>R493A</sup>-YFP*)  
787 are described in (García et al., 2010; Wagner et al., 2013; Cui et al., 2018; Bhandari  
788 et al., 2019). *Arabidopsis* plants for bacterial infiltration assays were grown for 4-5  
789 weeks under a 10 h light/14h dark regime at 22°C/20°C and ~65% relative humidity.  
790 *Arabidopsis* plants were kept under the same conditions after infiltration. Prior  
791 assays, *N. benthamiana* plants were grown for 5-6 weeks under a 16 h light/8 h dark  
792 regime at ~24°C.

793

### 794 **Vectors generation by Gateway cloning**

795 Coding sequences of *EDS1* and *PAD4* with stop codons were amplified from cDNA  
796 potato (DM 1-3), barley (cv. Golden Promise) and *Brachypodium distachyon* (BD21-  
797 3). *Arabidopsis* Col genomic and coding *EDS1*, *PAD4* and *SAG101* sequences were  
798 cloned previously (Feys et al., 2005; García et al., 2010; Wagner et al., 2013).  
799 Sequences of *AtNRG1.1* (AT5G66900.1), extended *AtNRG1.1* (AT5G66900.2) and  
800 *AtNRG1.2* (AT5G66910) were PCR-amplified using genomic DNA of Col as a

801 template from start to stop codons. PCR amplification for all cloning was performed  
802 with Phusion (F530, Thermo Fisher Scientific) or PrimeStar HS (R010A, Clontech)  
803 polymerases. All sequences were cloned into pENTR/D-TOPO (K240020, Thermo  
804 Fisher Scientific) and verified by Sanger sequencing. Sequences of oligonucleotides  
805 used for cloning are provided in Supplemental Table 3. Entry clones for *SIEDS1* and  
806 *SIPAD4* from cv. VF36 are described in (Gantner et al., 2019). *AtNRG1.1* and  
807 *AtNRG1.2* sequences without stop codons were obtained by site-directed  
808 mutagenesis of the pENTR/D-TOPO constructs with stop codons. Recombination  
809 into pB7GWF2.0 (Karimi et al., 2002), pB7FWG2.0 (Karimi et al., 2002),  
810 pDEST\_GAD424 (Mitsuda et al., 2010), pDEST\_BTM116 (Mitsuda et al., 2010),  
811 pXCSG-GW-StrepII-3xHA (Witte et al., 2004), pXCSG-GW-mYFP (with  
812 *AtNRG1.1\_Stop* and *AtNRG1.2\_Stop* to generate non-tagged expression constructs;  
813 (Witte et al., 2004)), pXCG-GW-3xFLAG, pXCG-GW-mYFP and pENSG-YFP (Witte  
814 et al., 2004) as well as custom pENpAtPAD4 StrepII-YFP (Supplemental Dataset 8  
815 with sequence in .gbk format) was performed using LR Clonase II (11791100, Life  
816 technologies).

817

## 818 **Vector generation by Golden Gate cloning**

819 Level 0 constructs for coding sequences of *SIEDS1*, *SIPAD4*, *AtEDS1*, *AtPAD4*,  
820 *NbSAG101b* and promoter sequences of *AtEDS1* and *AtPAD4* are described in  
821 (Gantner et al., 2018; Gantner et al., 2019). *HvEDS1* and *HvPAD4* from cv. Golden  
822 Promise were cloned into level 0 pICH41308. Synthesized (GeneArt, ThermoFisher  
823 Scientific) coding sequence of *NbSAG101a* was cloned into the level 0 vector  
824 pAGM1287. At level 1, Arabidopsis, tomato and barley *PAD4* coding sequences were  
825 cloned into pICH47811 (*pAtPAD4:YFP-xxPAD4-35S\_term*), *EDS1* – pICH47802  
826 (*pAtEDS1:3xFLAG-xxEDS1-35S\_term*). For level 2 constructs in pAGM4673, the  
827 *PAD4* expression module was placed at position 1, *EDS1* – at position 2, and  
828 *pNos:BASTA<sup>R</sup>-Nos\_term* (pICSL70005) - cassette at position 3. The  
829 *35S:NbSAG101a-GFP-35S\_term* and *35S:NbSAG101b-GFP-35S\_term* expression  
830 constructs were cloned into pICH47802. Backbones (pAGM1287, pICH41308,  
831 pICH47802, pICH47811), tags (pICSL30005, pICSL30004, pICSL50008) and 0.4 kb  
832 CaMV35S promoter (pICH51277) and terminator (pICH41414) modules as well as  
833 BASTA<sup>R</sup> expression cassette (pICSL70005) are from the Golden Gate cloning toolkit

834 (Engler et al., 2014). Sequences of oligonucleotides used for cloning are provided in  
835 Supplemental Table 3.

836

### 837 **Site-directed mutagenesis and generation of AtPAD4-AtSAG101 chimeras**

838 To substitute stop codons for alanine in pENTR/D-TOPO *AtNRG1.1*, pENTR/D-  
839 TOPO *AtNRG1.2* and to introduce F419E and H476F mutations in pENTR/D-TOPO  
840 *pAtEDS1:gAtEDS1* (García et al., 2010), QuikChange II Site-Directed mutagenesis  
841 protocol (#200555, Agilent) was used with hot start polymerases Phusion (F530,  
842 ThermoFisher Scientific) or Prime Star (R010A, Takara). pDONR207 *AtPAD4*-  
843 *AtSAG101* chimeric sequences were generated by overlapping PCR with  
844 oligonucleotides in Supplemental Table 3 and LR recombined into pENSG-mYFP  
845 (Witte et al., 2004) or a modified pENSG-mYFP with a *CaMV 35S* promoter  
846 substituted for a 1,083 bp *AtPAD4* region upstream of start codon (Supplemental  
847 Dataset 8 with sequence “pENpAtPAD4 StrepII-mYFP-GW.gbk”). In the expression  
848 constructs, *AtPAD4-AtSAG101* chimeras were N-terminally tagged: *35S:mYFP-*  
849 *chimera* for cell death reconstitution assays or *pAtPAD4:StrepII-mYFP-chimera* for  
850 localization assays.

851

### 852 **Yeast-two-hybrid (Y2H) assays**

853 Coding sequences of Arabidopsis (*At*), tomato (*S*), potato (*St*), barley (*Hv*) and  
854 *Brachypodium distachyon* (*Bd*) *EDS1* and *PAD4* in pENTR/D-TOPO were LR-  
855 recombined into gateway-compatible pDEST\_GAD424 (Gal4 AD domain) and  
856 pDEST\_BTM116 (LexA BD domain) (Mitsuda et al., 2010), respectively. The yeast  
857 leucine (L), tryptophan (W) and histidine (H) auxotroph strain L40 was used. No 3-  
858 amino-1,2,4-triazole (3-AT) was added to SD selection plates without L, W and H.  
859 Yeast growth on selection plates –LW and –LWH was recorded at 3 d after  
860 transformation.

861

### 862 **Transient expression (agroinfiltration) assays in *N. benthamiana***

863 *N. benthamiana* plants for agroinfiltration assays were grown under long-day  
864 conditions (24°C) for 5-6 weeks. Expression constructs (pAGM4673  
865 *pAtEDS1:3xFLAG-xxEDS1/pAtPAD4:YFP-xxPAD4* (xx stands for donor species *At*,  
866 *Sl* or *Hv*), pICH47811 *pAtPAD4:YFP-AtPAD4*, pICH47802 *pAtEDS1:3xFLAG-*  
867 *SIEDS1*, pICH47802 *35S:NbSAG101a-GFP*, pICH47802 *35S:NbSAG101b-GFP*,  
868 pXCG *pAtEDS1:gAtEDS1-YFP* WT or 'LLIF', R493A, H476F, F419E variants, pXCG  
869 *pAtEDS1:gAtEDS1-3xFLAG*, pXCG *pAtEDS1:gAtEDS1<sup>LLIF</sup>-3xFLAG*, pENS  
870 *35S:3xFLAG-cAtEDS1<sup>1-384</sup>*, *35S:AtNRG1.1\_stop* and *35S:AtNRG1.2\_stop* without a  
871 tag in pXCSG-mYFP, pXCSG *35S:AtNRG1.1-SH*, pXCSG *35S:AtNRG1.2-SH*,  
872 pB7WGF2.0 *35S:GFP-AtNRG1.1*, pB7WGF2.0 *35S:GFP-AtNRG1.2*, pB7WGF2.0  
873 *35S:AtNRG1.1-GFP*, pB7WGF2.0 *35S:AtNRG1.2-GFP*, pXCSG *35S:gAtSAG101-*  
874 *SH*, pXCSG *35S:gAtSAG101-YFP*, pICH47811 *pAtPAD4:YFP-AtPAD4*, pXCSG  
875 *35S:AtPAD4-YFP*, pENSG *35S:SH-AtPAD4*, pENSG *35S:mYFP-AtPAD4/AtSAG101*  
876 chimeras 1 to 4, pENS *pAtPAD4:StreptII-mYFP-AtPAD4/AtSAG101* chimeras 1 to 4,  
877 pAM-PAT *35S:YFP*) were electroporated into *Rhizobium radiobacter* (*Agrobacterium*  
878 *tumefaciens*) GV3101 pMP90RK or pMP90. Final OD<sub>600</sub> for each strain was set to  
879 0.2, each sample contained *A. tumefaciens* C58C1 pCH32 to express *35S:p19* (final  
880 OD<sub>600</sub>=0.2 as well). Before syringe infiltration, *A. tumefaciens* was incubated in  
881 induction buffer (10 mM MES pH5.6, 10 mM MgCl<sub>2</sub>, 150 nM acetosyringone) for 1-2 h  
882 in the dark at room temperature.

883

## 884 **Western blot analysis**

885 To test accumulation of proteins in *N. benthamiana* transient expression assays, four  
886 8 mm leaf discs each were harvested at 2 dpi, ground in liquid nitrogen to powder  
887 and boiled in 150 µl 2xLaemmli buffer for 10 min at 95°C. For Arabidopsis lines, four  
888 8 mm leaf discs or 4-5 seedlings per sample were processed in the same manner.  
889 The proteins were resolved on 8 or 10% SDS-PAGE (1610156, Bio-Rad) and  
890 transferred using the wet transfer method onto a nitrocellulose membrane  
891 (10600001, GE Healthcare Life Sciences). For protein detection, primary antibodies  
892 (anti-GFP #2956 (Cell Signaling Technology) or 11814460001 (Roche), anti-HA  
893 #3724 (Cell Signaling Technology) or 11867423001 (Roche), anti-FLAG F7425  
894 (Sigma Aldrich) or F1804 (Sigma Aldrich), anti-myc #2278 (Cell Signaling  
895 Technologies)) were used in the dilution 1:5,000 (1xTBST, 3% milk powder, 0.01%

896 NaAz). Secondary HRP-conjugated antibodies (A9044 and A6154 (Sigma Aldrich),  
897 sc-2006 and sc-2005 (Santa Cruz)) were applied in the dilution 1:5,000. Detection of  
898 the signal was performed with enhanced luminescence assays Clarity and Clarity  
899 Max (1705061 and 1705062, Bio-Rad) or SuperSignal West Pico and Femto (34080  
900 and 34095, ThermoFisher Scientific) using ChemiDoc (Bio-Rad). For loading control,  
901 membranes were stained with Ponceau S (09276-6X1EA-F, Sigma Aldrich).

902

### 903 **Immunoprecipitation (IP) assays**

904 Five 10 mm leaf discs were collected from *N. benthamiana* leaves at 2-3 days post  
905 agroinfiltration and ground in liquid nitrogen. All further steps were performed at 4°C if  
906 not mentioned otherwise. Soluble fraction was extracted in 5 ml of the buffer  
907 containing 50 mM Tris-HCl pH 7.5, 150 mM NaCl, 10% glycerol, 5 mM DTT, 1%  
908 Triton X-100 and EDTA-free 1x Plant Protease Inhibitor Cocktail (11873580001,  
909 Sigma Aldrich). Debris was removed by 2x15 min centrifugation at 14,000 g. All IPs  
910 were performed with 10 µl of anti-FLAG M2 Affinity Gel slurry (A2220, Sigma  
911 Aldrich). After 2.5 h of incubation under constant rotation, beads were washed in 4-5  
912 ml of the extraction buffer and eluted by boiling in 100 µl of 2xLaemmli for 10 min at  
913 95°C.

914

### 915 ***Xanthomonas* infection assays in the presence of *A. tumefaciens***

916 *Xanthomonas campestris* pv. *vesicatoria* (*Xcv*) (85-10) (Thieme et al., 2005)  
917 (*Xanthomonas euvesicatoria*) kindly provided by Ulla Bonas was added to *A.*  
918 *tumefaciens* mixes to a final OD<sub>600</sub>=0.0005. *A. tumefaciens* strains were prepared as  
919 for the transient expression assays except without a P19 expressing strain. To  
920 ensure equal OD<sub>600</sub> in all samples, *A. tumefaciens* expressing *p35S:YFP* was used in  
921 all experiments as filler. The bacterial mix was syringe-infiltrated into *N. benthamiana*  
922 leaves. *A. tumefaciens pAtEDS1:3xFLAG-SIEDS1* complemented *Xcv* susceptibility  
923 in *N. benthamiana eds1a* in an OD<sub>600</sub> range of 0.05 to 0.6. For consistency between  
924 the cell death assays, a final *A. tumefaciens* OD<sub>600</sub>=0.2 was used for each strain.  
925 After infiltration, plants were placed in a long-day chamber (16 h light / 8h dark at  
926 25°C/23°C). Bacteria were isolated at 0 dpi (three 8 mm leaf discs served as three  
927 technical replicates) and 6 dpi (four 8 mm leaf discs representing four technical

928 replicates), and dilutions were dropped onto NYGA supplemented with Rifampicin  
929 100 mg/l and Streptomycin 150-200 mg/l. In statistical analysis of *Xcv* titers at 6 dpi,  
930 results from independent experiments (biological replicates) were combined.  
931 Normality of residuals distribution and homogeneity of variance was assessed  
932 visually and by Shapiro-Wilcoxon as well as Levene tests ( $p>0.05$ ). If both conditions  
933 were met, ANOVA was followed by Tukey's HSD test ( $\alpha=0.001$ ), otherwise Nemenyi  
934 test with Bonferroni correction for multiple testing was applied ( $\alpha=0.01$ ).

935

### 936 **Cell death assays in *N. benthamiana***

937 After agroinfiltration, *N. benthamiana* plants were placed under a 16 h light/8 h dark  
938 regime at 22°C. Six 8 mm leaf discs from *N. benthamiana* agroinfiltrated leaves were  
939 taken at 3 dpi, washed in 10-20 ml of mQ for 30-60 min, transferred to a 24-well plate  
940 with 1 ml mQ in each well and incubated at room temperature. Ion leakage was  
941 measured at 0 and 6 h with a conductometer Horiba Twin Model B-173. For statistical  
942 analysis, results of measurements at 6 h for individual leaf discs (each leaf disc  
943 represents a technical replicate) were combined from independent experiments  
944 (biological replicates). Data were checked for normality of residuals distribution and  
945 homogeneity of variance using visual examination of the plots and Shapiro-Wilcoxon  
946 and Levene tests ( $p>0.05$ ). If both conditions were met, ANOVA was followed by  
947 Tukey's HSD posthoc test ( $\alpha=0.001$ ). Otherwise, non-parametric Nemenyi test with  
948 Bonferroni correction for multiple testing was applied ( $\alpha=0.01$ ). For visual  
949 assessment of cell death symptoms, infiltrated leaves were covered in aluminum foil  
950 for 2 d and opened to "dry" the lesions and enhance visual symptoms at 3 dpi.

951

### 952 ***Pseudomonas* infection and cell death assays in Arabidopsis**

953 *Pseudomonas syringae* pv. *tomato* DC3000 (*Pst*) *pVSP61 avrRps4* (Hinsch and  
954 Staskawicz, 1996) was syringe-infiltrated into leaves at  $OD_{600}=0.0005$  in 10 mM  
955  $MgCl_2$ . After infiltration, lids were kept on trays for 24 h and then removed. Bacteria  
956 were isolated at 0 dpi (6 to 8 5 mm leaf discs making 3-4 technical replicates) and 3  
957 dpi (10 to 12 5 mm leaf discs distributed over 5-6 technical replicates). Dilutions were  
958 plated onto NYGA plates supplemented with rifampicin 100 mg/l and kanamycin 25



959 mg/l. For statistical analysis, bacterial titers from independent experiments (biological  
960 replicates) were combined. Normality of residuals distribution and homoscedasticity  
961 was checked visually and with formal Shapiro-Wilcoxon and Levene tests ( $\alpha=0.05$ ).  
962 Collected titer data were considered suitable for ANOVA and Tukey's HSD test  
963 ( $\alpha=0.001$ ). For cell death assays, *Pseudomonas fluorescens Pf0-1 pEDV6 avrRps4*  
964 (Sohn et al., 2014) was grown at 28°C on King's B medium (tetracycline 5 mg/l,  
965 chloramphenicol 30 mg/l), resuspended at a final OD<sub>600</sub>=0.2 in 10 mM MgCl<sub>2</sub> and  
966 syringe-infiltrated into leaves. Ten leaves (technical replicates) per genotype were  
967 infiltrated for each independent experiment (biological replicate). Ion leakage assays  
968 were performed at 0 and 8 hpi as described (Heidrich et al., 2011), with an  
969 independent experiment considered as a biological replicate. Cell death symptoms  
970 visible as collapse of infiltrated areas of leaves were recorded at 24 hpi.

971

#### 972 ***Hyaloperonospora arabidopsidis* (Hpa) Emwa1 infection assays**

973 Seedlings from segregating (3:1) Arabidopsis T3 transgenic lines coexpressing  
974 3xFLAG-EDS1 and YFP-PAD4 from Arabidopsis or tomato were preselected at 10 d  
975 on ½ MS plates supplemented with phosphinothricin (10 mg/l). A Col 35S:*StreptII-*  
976 *3xHA-YFP* transgenic line and *eds1-2 pad4-1 sag101-1* used as controls were pre-  
977 grown on PPT plates alongside the test lines. Ws-2 seedlings were grown on ½ MS  
978 plates without PPT. After selection, seedlings were transplanted onto soil in Jiffy pots  
979 and grown for additional 7 d under a 10 h light /14 h dark, 22°C/20°C regime. *Hpa*  
980 Emwa1 spray inoculation (40 conidiospores/μl dH<sub>2</sub>O) was performed as described  
981 (Stuttman et al., 2011). *Hpa* colonization was quantified by counting conidiospores  
982 on leaves at 7 dpi. In statistical analysis, counts normalized per mg of fresh weight  
983 (five counts used as technical replicates) from independent experiments (biological  
984 replicates) were combined. Significance of difference in spore counts was assessed  
985 with a non-parametric Nemenyi test and Bonferroni correction for multiple testing  
986 ( $\alpha=0.01$ ).

987

#### 988 **Laser scanning fluorescence microscopy**

989 Analysis of protein subcellular localization after transient expression in *N.*  
990 *benthamiana* was performed 2-3 dpi with the exception *AtNRG1.1* and *AtNRG1.2*  
991 experiments performed at 1 dpi to avoid quenching of GFP signal due to *AtNRG1.2*-  
992 triggered cell death. Fluorescence signals in 8 mm leaf discs transiently expressed  
993 proteins was recorded on a laser-scanning confocal microscopes LSM780 or  
994 LSM700 (Zeiss) and generally under conditions when intensity of only a small fraction  
995 of pixels was saturated. Z-stacks were projected with ZEN (Zeiss) or Fiji using  
996 maximum intensity or standard deviation methods. Used objectives: 40x (NA=1.3 oil  
997 or 1.2 water) and 63x (NA=1.4 oil or 1.2 water).

998

999 **Generation of Arabidopsis *nrg1.1 nrg1.2 (n2)* and *nrg1.1 nrg1.2 adr1 adr1-L1***  
1000 ***adr1-L2 (n2a3)* mutants**

1001 Arabidopsis *n2* and *n2a3* mutants were generated using targeted mutagenesis with  
1002 the Clustered Regularly Interspaced Short Palindromic Repeats (CRISPR) –  
1003 CRISPR-associated 9 (Cas9) method. Six guide RNAs (Supplemental Table 3) were  
1004 designed to target the first two exons in *AtNRG1.1* and *AtNRG1.2* using CRISPR-P  
1005 2.0 (Liu et al., 2017). *AtNRG1.3* was not targeted because it is likely a pseudogene  
1006 (Castel et al., 2018; Wu et al., 2018b). Two arrays of three fusions  
1007 “*pU6:sgRNA\_backbone-Pol\_III\_terminator*” each were synthesized (GeneArt,  
1008 ThermoFisher Scientific) based on a template from (Peterson et al., 2016) with  
1009 flanking SbfI/PmeI/SmaI sites for merging via restriction-ligation. The merged single  
1010 array was further cloned into the pKIR1.0 (Tsutsui and Higashiyama, 2017) at the  
1011 SbfI restriction site. To generate *n2* and *n2a3* mutant lines, the construct was  
1012 electroporated into *A. tumefaciens* GV3101 pMP90RK for subsequent floral dip  
1013 transformation (Logemann et al., 2006) into Col and Col *adr1 adr1-L1 adr1-L2*  
1014 ((Bonardi et al., 2011)), respectively. T1 plants with active gRNA-Cas9 were  
1015 preselected with the T7 endonuclease 1 assay (Hyun et al., 2015) or by direct  
1016 sequencing of PCR products covering the target regions. Absence of the Cas9  
1017 construct in lines homozygous for the *nrg1.1 nrg1.2* double mutation in *n2* and *n2a3*  
1018 was tested with PCR using oligonucleotides matching the *Hyg* resistance gene in the  
1019 T-DNA insertion and visually as lack of red fluorescence in the seed coat (Tsutsui  
1020 and Higashiyama, 2017). One homozygous line free of the mutagenesis construct  
1021 was selected for *n2* and *n2a3*. Mutations detected in the *AtNRG1.1* and *AtNRG1.2*

1022 genes in *n2* and *n2a3* lines are shown in Supplemental Figure 8A. Oligonucleotides  
1023 used for genotyping of the mutants are listed in the Supplemental Table 3.

1024

### 1025 **Identification of orthogroups (OGs)**

1026 To build OGs from predicted 52 plant proteomes (listed in Supplemental Table 4),  
1027 results of bidirectional BLASTP search (all versus all, E-value cut-off 1e-3, ncbi-blast-  
1028 2.2.29+; (Altschul et al., 1990)) were used for orthology inference in orthomcl  
1029 (v.2.0.9, E-value cut-off is 1e-5) with mcl clustering tool (v. 14-137) (Li et al., 2003).  
1030 This resulted in 99,696 OGs. OrthoMCL generated OGs for EDS1, PAD4 and  
1031 SAG101 were further verified with BLASTP (e-value 0.00001) against Arabidopsis  
1032 (TAIR10). Original SAG101 OG appeared to be contaminated with AT3G01380, while  
1033 EDS1 and PAD4 OGs contained only respective Arabidopsis hits. To systematically  
1034 filter for high confidence EDS1-family orthologs, EDS1, PAD4 as well as BLASTP-  
1035 verified SAG101 sequences were tested for the presence of EP domain (Hidden-  
1036 Markov Model (HMM) profile for EP domain in Supplemental Dataset 4, hmmsearch -  
1037 -incE 0.00001 in HMMER 3.1b2 (Eddy, 2011),  $\geq 50$  amino acid long match). EP  
1038 domain HMM was obtained with hmmbuild (in HMMER 3.1b2 (Eddy, 2011), default  
1039 parameters) using MUSCLE multiple sequence alignment for EP domain sequences  
1040 found by BLASTP (-evalue 0.01) with EP domains of *At*EDS1 (Q9XF23 385-623),  
1041 *At*PAD4 (Q9S745 300-541), *At*SAG101 (Q4F883 291-537) (Wagner et al., 2013)  
1042 against proteomes of 32 plant species from algae to *Arabidopsis thaliana*  
1043 (Supplemental Table 5). Finally, too short ( $\leq 400$  aa) and too long ( $\geq 1200$ ) sequences  
1044 in OrthoMCL-derived OGs were removed. A full pipeline and scripts to extract EP  
1045 sequences and build HMM are in the Github repository “Lapin\_Kovacova\_Sun\_et\_al”  
1046 ([https://github.com/ParkerLabMPIPZ/Lapin\\_Kovacova\\_Sun\\_et\\_al](https://github.com/ParkerLabMPIPZ/Lapin_Kovacova_Sun_et_al)). Filtered EDS1-  
1047 family OGs are referred to as “high confidence orthologs” (Supplemental Datasets 5,  
1048 6 and 7). Their counts are given in Supplemental Table 1. BLASTP against TAIR10  
1049 did not detect contamination of ADR1 and NRG1 OrthoMCL OGs with other proteins.  
1050 Their counts are also provided in Supplemental Table 1.

1051 Additional manual searches for EDS1-family and NRG1 orthologs were performed  
1052 using reciprocal BLASTP with Arabidopsis EDS1, PAD4, SAG101 and NRG1.1  
1053 sequences against spinach (*Spinacia oleracea*, [bvseq.molgen.mpg.de](http://bvseq.molgen.mpg.de); v.1.0.1),

1054 raspberry (*Rubus occidentalis*, rosaceae.org; v1.0.a1), jujube (*Ziziphus jujube* (Liu et  
1055 al., 2014)), sesame (*Sesamum indicum*, Sinbase; v1.0) and quinoa (*Chenopodium*  
1056 *quinoa* (Zou et al., 2017)). *Nicotiana benthamiana* EDS1-family sequences were  
1057 obtained with tblasn searches of tomato sequences EDS1-family sequences on  
1058 solgenomics.net and match sequences from (Ordon et al., 2017; Gantner et al.,  
1059 2019). To search for EDS1, PAD4, ADR1 and NRG1 orthologs in *Silene* genus  
1060 (Balounova et al., 2019), BLASTX (-word\_size 4 -evalue 1e-20) was performed with  
1061 Arabidopsis amino acid sequences against nonfiltered *de novo* transcriptome  
1062 assemblies. We considered a gene to be present in the assembly, if Arabidopsis  
1063 sequence had a significant match with a unique contig.

1064

### 1065 **Phylogenetic and conservation analyses**

1066 Full-length EDS1-family sequences including high-confidence EDS1, PAD4 and  
1067 SAG101 orthologs (Supplemental Datasets 5, 6, 7) and additional sequences from  
1068 literature and other databases are provided in the Supplemental Dataset 1. To  
1069 prepare EDS1-family maximum likelihood (ML) tree, the EDS1-family protein  
1070 sequence alignment produced with mafft (version mafft-7.221, linsi, 100 iterations;  
1071 (Kato et al., 2002; Kato and Standley, 2013)) was filtered using Gblocks (gap  
1072 positions <50%, number of contiguous non-conserved positions - 15, minimum length  
1073 of conserved block - 4; (Castresana, 2000; Talavera and Castresana, 2007)) leaving  
1074 101 positions in 12 blocks (Supplemental Dataset 2). The best evolutionary model  
1075 (JTT+G) was selected with protTest3 (Darriba et al., 2011) based on the BIC  
1076 criterion. The best ML tree was calculated with RAxML v.8.1.21 (-f a, 1000  
1077 bootstraps; (Stamatakis, 2014)). For Bayesian inference of EDS1-family protein  
1078 phylogeny, we used MrBayes-3.2.6 with the same alignment as used for the ML tree  
1079 (# generations - 5000000, # runs - 4, aa model - mixture of models, gamma rates;  
1080 (Huelsenbeck and Ronquist, 2001; Ronquist and Huelsenbeck, 2003)). Annotated  
1081 phylogenetic trees are available via iTOL (link in the section with accession numbers;  
1082 (Letunic and Bork, 2016))

1083 For the best nucleotide-binding domain found in Apaf-1, R-proteins and CED-4  
1084 (NBARC) domain ML tree, NBARC domain sequences were extracted based on the  
1085 tabular output of hmmsearch (--incE 0.01, HMMER 3.1b2 (Eddy, 2011); PFAM

1086 PF00931.21 pfam.xfam.org) and aligned with mafft (version mafft-7.407, linsi, 1000  
1087 max iterations, (Kato et al., 2002; Kato and Standley, 2013)). The NBARC domain  
1088 alignment without editing was supplied to RAxML (v.8.2.10, -f a, 800 bootstraps, LG  
1089 model with empirical amino acid frequencies proposed via -m PROTGAMMAAUTO;  
1090 this model was selected as best fitting in protTest3 (Darriba et al., 2011) as well).  
1091 Gblocks-filtered NBARC domain alignment produced similar topology, but lower  
1092 bootstrap support values on almost all branches. The annotated NBARC  
1093 phylogenetic tree is available via iTOL (link in the section with accession numbers;  
1094 (Letunic and Bork, 2016)).

1095 For calculations of EDS1 family evolutionary conservation rates, amino acid  
1096 sequences were aligned with mafft (version mafft-7.221-without-extensions, linsi, 100  
1097 iterations). Branch lengths of ML phylogenetic trees for EDS1, PAD4 and SAG101  
1098 built with RAxML (version standard-RaxML-8.1.21; (Stamatakis, 2014)) were  
1099 optimized with rate4site package (version - rate4site-3.0.0, default parameters,  
1100 background optimization with gamma model; (Pupko et al., 2002)). Mapping of the  
1101 evolutionary rates onto the structure *At*EDS1-*At*SAG101 or homology-based model  
1102 *At*EDS1-*At*PAD4 (Wagner et al., 2013) was performed in PyMol v2.0.7.

1103

#### 1104 **Positive selection tests for EDS1**

1105 Analyses of evolutionary pressure acting on EDS1 sequence as the whole, as well as  
1106 per site was performed with PAML package (Yang, 2007). The CODEML program of  
1107 PAML 4.9a (Yang, 2007) was employed to estimate the ratio ( $\omega$ ) of the non-  
1108 synonymous substitution rate (dN) to the synonymous substitution rate (dS). In all  
1109 models, the reference tree was an unrooted maximum likelihood phylogenetic tree of  
1110 EDS1 sequences with optimized branch lengths (CODEML program with the codon  
1111 model M0 and the site model NS0, as recommended in PAML FAQ doc (page 14,  
1112 <http://abacus.gene.ucl.ac.uk/software/pamlFAQs.pdf>)). The equilibrium frequencies of  
1113 codons were calculated from the nucleotide frequencies (CodonFreq=2) using  
1114 jmodeltest-2.1.10 (Guindon et al., 2003; Darriba et al., 2012). Modelling of all models  
1115 listed in Supplementary Table 2 was done with the following initial  $\omega$  values:  $\omega=0.1$ ,  
1116  $\omega=0.5$ ,  $\omega=1$  and  $\omega=2$ . Since multinucleotide mutations can lead to false inference of

1117 positive selection (Venkat et al., 2018), we provide alignments at positions with  
1118 inferred positive selection in *Brassicaceae* EDS1 (Supplemental Figure 1D).

1119

#### 1120 **R packages frequently used in this study**

1121 The following R packages were utilized (R core team 2016, bioconductor.org):

1122 ggplot2 (<http://ggplot2.org>; 3.0.0), PMCMRplus ([https://CRAN.R-](https://CRAN.R-project.org/package=PMCMRplus)

1123 [project.org/package=PMCMRplus](https://CRAN.R-project.org/package=PMCMRplus); 1.0.0), multcompView ([https://CRAN.R-](https://CRAN.R-project.org/package=multcompView)

1124 [project.org/package=multcompView](https://CRAN.R-project.org/package=multcompView); 0.1-7), bioStrings (2.42.1).

1125

1126 **Accession numbers**

1127 Accession numbers of EDS1, PAD4 and SAG101 orthologs used in the study:

1128 *At*EDS1 (AT3G48090.1), *At*PAD4 (AT3G52430.1), *At*SAG101 (AT5G14930.2),  
1129 *S*EDS1 (Solyc06g071280.2.1), *S*PAD4 (Solyc02g032850.2.1), *St*EDS1  
1130 (PGSC0003DMP400055762), *St*PAD4 (PGSC0003DMP400034509), *Bd*EDS1  
1131 (XP\_003578076.1), *Bd*PAD4 (XP\_003577748.1), *Hv*EDS1 (MLOC\_67615.1),  
1132 *Hv*PAD4 (HORVU4Hr1G043530.1), *Nb*SAG101a (Niben101Scf00271g02011.1),  
1133 *Nb*SAG101b (Niben101Scf01300g01009.1).

1134 Accession numbers of NBARC-containing proteins used to infer phylogenetic  
1135 placement of ADR1 and NRG1 NBARC domains: *At*NRG1.1 (Q9FKZ1), *At*NRG1.2  
1136 (Q9FKZ0), *Nb*NRG1 (Q4TVR0), *Sl*ADR1 (Solyc04g079420), *Os*ADR1  
1137 (LOC\_Os12g39620.3), *Hv*ADR1 (A0A287QID5), *At*ADR1 (Q9FW44), *At*ADR1-L1  
1138 (Q9SZA7), *At*ADR1-L2 (Q9LZ25), *S*Bs4 (Q6T3R3), *Lus*L6 (Q40253), *Nb*Roq1  
1139 (A0A290U7), *At*RPP1 (F4J339), *At*RPP4 (F4JNA9), *At*RPS4 (Q9XGM3), *At*RPS2  
1140 (Q42484), *Os*RLS1 (Q6Z6E7), *St*Rx (Q9XGF5), AT5G56220 (Q9FH17), *Cc*Bs2  
1141 (Q9SNW0), *SNRC*1 (A1X877), *SNRC*2 (K4CZZ5), *Hv*MLA10 (Q6WWJ4), *At*RPP8  
1142 (Q8W4J9), *At*RPM1 (Q39214), *At*ZAR1 (Q38834).

1143 Annotated EDS1 family phylogenetic trees:

1144 ML tree <https://itol.embl.de/tree/1953746254251611535639755>

1145 Bayesian tree <https://itol.embl.de/tree/195374625452181536083186>

1146 Annotated ML tree for NBARC domains from selected NLR proteins

1147 <https://itol.embl.de/tree/1953746254304461545300543>

1148 Content of GitHub repository “Lapin\_Kovacova\_Sun\_et\_al”: pipeline and scripts to  
1149 derive EP domain HMM (sub-directory “EP\_domain\_HMM”), pipeline and scripts  
1150 used to filter OrthoMCL EDS1-family OG and obtain high-confidence sequences  
1151 (sub-directory “high\_confidence\_OG”). Link -  
1152 [https://github.com/ParkerLabMPIPZ/Lapin\\_Kovacova\\_Sun\\_et\\_al](https://github.com/ParkerLabMPIPZ/Lapin_Kovacova_Sun_et_al)

1153

1154 **Supplemental Data Files**

1155 Supplemental Table 1. Counts of EDS1, PAD4, SAG101, ADR1 and NRG1 orthologs  
1156 in 52 green plants

1157 Supplemental Table 2. Selection pressure acting on EDS1 sequences in *Poaceae*,  
1158 *Solanaceae* and *Brassicaceae*

1159 Supplemental Table 3. Sequences of oligonucleotides used in this study

1160 Supplemental Table 4. Names of 52 green plant species used in the OrthoMCL  
1161 analysis

1162 Supplemental Table 5. Names of 32 green plant species used to build EP domain  
1163 Hidden-Markov Model (HMM) profile

1164 Supplemental Dataset 1. Sequences of EDS1-family proteins used for ML and  
1165 Bayesian phylogeny inference (fasta format)

1166 Supplemental Dataset 2. Gblocks-filtered alignment of EDS1-family sequences used  
1167 for the phylogenetic analysis with RAxML and MrBayes

1168 Supplemental Dataset 3. Correspondence between EDS1-family sequence names on  
1169 the phylogenetic trees and in public databases

1170 Supplemental Dataset 4. EP domain Hidden-Markov Model (HMM) profile

1171 Supplemental Dataset 5. Sequences of high-confidence EDS1 orthologs (fasta  
1172 format)

1173 Supplemental Dataset 6. Sequences of high-confidence PAD4 orthologs (fasta  
1174 format)

1175 Supplemental Dataset 7. Sequences of high-confidence SAG101 orthologs (fasta  
1176 format)

1177 Supplemental Dataset 8. Sequence of the custom destination Gateway vector  
1178 pENpAtPAD4 StrepII-YFP (.gbk format)

1179



1180 **Acknowledgements**

1181 We thank Ulla Bonas (Martin-Luther University, Halle) for the strain Xcv 85-10 and  
1182 Artem Pankin (MPIPZ) for helpful discussions. This work was supported by the Max  
1183 Planck Society and Deutsche Forschungsgemeinschaft (DFG) Grants CRC680 (JEP,  
1184 DL, VK, AB), CRC670 (JEP, DB), CRC648 (JS), DFG-ANR Trilateral ‘RADAR’ grant  
1185 (JD), an International Max-Planck Research School (IMPRS) doctoral fellowship  
1186 (PvB) and a Chinese Scholarship Council PhD fellowship (XS). No conflict of interest  
1187 declared.

1188

1189 **Author contributions**

1190 JEP and DL conceived the project. DL designed, coordinated and performed  
1191 experiments, generated *n2 a3* mutant, and prepared GitHub repository with input  
1192 from VK. VK designed and performed orthology inference and phylogenetic analyses.  
1193 XS, NG, DB, JB and JD performed experiments. JD designed CRISPR-Cas9  
1194 mutagenesis constructs and generated the *n2* mutant. DB designed and generated  
1195 structure-guided mutants. JB selected *Nb-epss* mutant and did EDS1/PAD4 ortholog  
1196 cloning. JS provided *Nb-pss* mutants, an F2 segregating population to select *Nb-epss*  
1197 and modules for golden gate cloning, and pENTR/D-TOPO clones of tomato EDS1  
1198 and PAD4. AB contributed to orthology analysis and discussions. DL and JEP wrote  
1199 the manuscript with input from all co-authors.

1200

## 1201 References

- 1202 Adlung, N., Prochaska, H., Thieme, S., Banik, A., Blüher, D., John, P., Nagel, O., Schulze,  
1203 S., Gantner, J., Delker, C., Stuttmann, J., and Bonas, U. (2016). Non-host Resistance  
1204 Induced by the *Xanthomonas* Effector XopQ Is Widespread within the Genus  
1205 *Nicotiana* and Functionally Depends on *EDS1*. *Frontiers in Plant Science* 7, 1796.
- 1206 Altschul, S.F., Gish, W., Miller, W., Myers, E.W., and Lipman, D.J. (1990). Basic local  
1207 alignment search tool. *Journal of Molecular Biology* 215, 403-410-410.
- 1208 Ariga, H., Katori, T., Tsuchimatsu, T., Hirase, T., Tajima, Y., Parker, J.E., Alcázar, R.,  
1209 Koornneef, M., Hoekenga, O., Lipka, A.E., Gore, M.A., Sakakibara, H., Kojima, M.,  
1210 Kobayashi, Y., Iuchi, S., Kobayashi, M., Shinozaki, K., Sakata, Y., Hayashi, T., Saijo,  
1211 Y., and Taji, T. (2017). *NLR* locus-mediated trade-off between abiotic and biotic  
1212 stress adaptation in *Arabidopsis*. *Nature Plants* 3, 17072.
- 1213 Baggs, E., Dagdas, G., and Krasileva, K.V. (2017). NLR diversity, helpers and integrated  
1214 domains: making sense of the NLR IDentity. *Current Opinion in Plant Biology* 38, 59-  
1215 67-67.
- 1216 Balounova, V., Gogela, R., Cegan, R., Cangren, P., Zluvova, J., Safar, J., Kovacova, V.,  
1217 Bergero, R., Hobza, R., Vyskot, B., Oxelman, B., Charlesworth, D., and Janousek, B.  
1218 (2019). Evolution of sex determination and heterogamety changes in section *Otites* of  
1219 the genus *Silene*. *Scientific Reports* 9, 1045.
- 1220 Bartsch, M., Gobbato, E., Bednarek, P., Debey, S., Schultze, J.L., Bautor, J., and Parker,  
1221 J.E. (2006). Salicylic Acid-Independent ENHANCED DISEASE SUSCEPTIBILITY1  
1222 Signaling in *Arabidopsis* Immunity and Cell Death Is Regulated by the  
1223 Monooxygenase FMO1 and the Nudix Hydrolase NUDT7. *The Plant Cell* 18, 1038-  
1224 1051-1051.
- 1225 Berendzen, K., Searle, I., Ravenscroft, D., Koncz, C., Batschauer, A., Coupland, G.,  
1226 Somssich, I.E., and Ülker, B. (2005). A rapid and versatile combined DNA/RNA  
1227 extraction protocol and its application to the analysis of a novel DNA marker set  
1228 polymorphic between *Arabidopsis thaliana* ecotypes Col-0 and Landsberg *erecta*.  
1229 *Plant Methods* 1, 4.
- 1230 Bhandari, D.D., Lapin, D., Kracher, B., Born, P.v., Bautor, J., Niefind, K., and Parker, J.E.  
1231 (2019). An EDS1 heterodimer signalling surface enforces timely reprogramming of  
1232 immunity genes in *Arabidopsis*. *Nature Communications* 10, 772.
- 1233 Bhattacharjee, S., Halane, M.K., Kim, S.H., and Gassmann, W. (2011). Pathogen Effectors  
1234 Target *Arabidopsis* EDS1 and Alter Its Interactions with Immune Regulators. *Science*  
1235 334, 1405-1408-1408.
- 1236 Bonardi, V., Tang, S., Stallmann, A., Roberts, M., Cherkis, K., and Dangl, J.L. (2011).  
1237 Expanded functions for a family of plant intracellular immune receptors beyond

- 1238 specific recognition of pathogen effectors. *Proceedings of the National Academy of*  
1239 *Sciences* 108, 16463-16468-16468.
- 1240 Castel, B., Ngou, P.M., Cevik, V., Redkar, A., Kim, D.S., Yang, Y., Ding, P., and Jones,  
1241 J.D.G. (2018). Diverse NLR immune receptors activate defence via the RPW8-NLR  
1242 NRG1. *New Phytologist*.
- 1243 Castresana, J. (2000). Selection of Conserved Blocks from Multiple Alignments for Their Use  
1244 in Phylogenetic Analysis. *Molecular Biology and Evolution* 17, 540-552-552.
- 1245 Collier, S.M., Hamel, L.-P., and Moffett, P. (2011). Cell Death Mediated by the N-Terminal  
1246 Domains of a Unique and Highly Conserved Class of NB-LRR Protein. *Molecular*  
1247 *Plant-Microbe Interactions* 24, 918-931-931.
- 1248 Concepcion, J.C.D.I., Franceschetti, M., Maqbool, A., Saitoh, H., Terauchi, R., Kamoun, S.,  
1249 and Banfield, M.J. (2018). Polymorphic residues in rice NLRs expand binding and  
1250 response to effectors of the blast pathogen. *Nature Plants*, 1-10-10.
- 1251 Cui, H., Tsuda, K., and Parker, J.E. (2015). Effector-Triggered Immunity: From Pathogen  
1252 Perception to Robust Defense. *Annual Review of Plant Biology* 66, 487-511.
- 1253 Cui, H., Gobbato, E., Kracher, B., Qiu, J., Bautor, J., and Parker, J.E. (2017). A core function  
1254 of EDS1 with PAD4 is to protect the salicylic acid defense sector in Arabidopsis  
1255 immunity. *New Phytologist* 213, 1802-1817-1817.
- 1256 Cui, H., Qiu, J., Zhou, Y., Bhandari, D.D., Zhao, C., Bautor, J., and Parker, J.E. (2018).  
1257 Antagonism of transcription factor MYC2 by EDS1/PAD4 complexes bolsters salicylic  
1258 acid defense in Arabidopsis effector-triggered immunity. *Molecular Plant*.
- 1259 Darriba, D., Taboada, G.L., Doallo, R., and Posada, D. (2011). ProtTest 3: fast selection of  
1260 best-fit models of protein evolution. *Bioinformatics* 27, 1164-1165-1165.
- 1261 Darriba, D., Taboada, G.L., Doallo, R., and Posada, D. (2012). jModelTest 2: more models,  
1262 new heuristics and parallel computing. *Nature Methods* 9, 772.
- 1263 Dong, O.X., Tong, M., Bonardi, V., Kasmi, F.E., Woloshen, V., Wünsch, L.K., Dangl, J.L.,  
1264 and Li, X. (2016). TNL-mediated immunity in Arabidopsis requires complex regulation  
1265 of the redundant *ADR1* gene family. *New Phytologist* 210, 960-973-973.
- 1266 Eddy, S.R. (2011). Accelerated Profile HMM Searches. *PLoS Computational Biology* 7,  
1267 e1002195.
- 1268 Engler, C., Youles, M., Gruetzner, R., Ehnert, T.-M., Werner, S., Jones, J.D.G., Patron, N.J.,  
1269 and Marillonnet, S. (2014). A Golden Gate Modular Cloning Toolbox for Plants. *ACS*  
1270 *Synthetic Biology* 3, 839-843-843.
- 1271 Feys, B.J., Moisan, L.J., Newman, M.A., and Parker, J.E. (2001). Direct interaction between  
1272 the Arabidopsis disease resistance signaling proteins, EDS1 and PAD4. *The EMBO*  
1273 *Journal* 20, 5400-5411-5411.

- 1274 Feys, B.J., Wiermer, M., Bhat, R.A., Moisan, L.J., Medina-Escobar, N., Neu, C., Cabral, A.,  
1275 and Parker, J.E. (2005). Arabidopsis SENESCENCE-ASSOCIATED GENE101  
1276 Stabilizes and Signals within an ENHANCED DISEASE SUSCEPTIBILITY1 Complex  
1277 in Plant Innate Immunity. *The Plant Cell Online* 17, 2601-2613-2613.
- 1278 Gantner, J., Ordon, J., Kretschmer, C., Guerois, R., and Stuttmann, J. (2019). An EDS1-  
1279 SAG101 complex functions in TNL-mediated immunity in Solanaceae. *bioRxiv*,  
1280 511956.
- 1281 Gantner, J., Ordon, J., Ilse, T., Kretschmer, C., Gruetzner, R., Löffke, C., Dagdas, Y.,  
1282 Bürstenbinder, K., Marillonnet, S., and Stuttmann, J. (2018). Peripheral infrastructure  
1283 vectors and an extended set of plant parts for the Modular Cloning system. *PLOS*  
1284 *ONE* 13, e0197185.
- 1285 Gao, Y., Wang, W., Zhang, T., Gong, Z., Zhao, H., and Han, G.-Z. (2018). Out of Water: The  
1286 Origin and Early Diversification of Plant *R*-Genes. *Plant Physiology*, pp.00185.02018.
- 1287 García, A.V., Blanvillain-Baufumé, S., Huibers, R.P., Wiermer, M., Li, G., Gobbato, E., Rietz,  
1288 S., and Parker, J.E. (2010). Balanced Nuclear and Cytoplasmic Activities of EDS1  
1289 Are Required for a Complete Plant Innate Immune Response. *PLoS Pathogens* 6,  
1290 e1000970.
- 1291 Glazebrook, J., Zook, M., Mert, F., Kagan, I., Rogers, E.E., Crute, I.R., Holub, E.B.,  
1292 Hammerschmidt, R., and Ausubel, F.M. (1997). Phytoalexin-deficient mutants of  
1293 Arabidopsis reveal that *PAD4* encodes a regulatory factor and that four PAD genes  
1294 contribute to downy mildew resistance. *Genetics* 146, 381-392-392.
- 1295 Guindon, S., Gascuel, O., and Rannala, B. (2003). A Simple, Fast, and Accurate Algorithm to  
1296 Estimate Large Phylogenies by Maximum Likelihood. *Systematic Biology* 52, 696-  
1297 704-704.
- 1298 Heidrich, K., Wirthmueller, L., Tasset, C., Pouzet, C., Deslandes, L., and Parker, J.E. (2011).  
1299 Arabidopsis EDS1 Connects Pathogen Effector Recognition to Cell Compartment-  
1300 Specific Immune Responses. *Science* 334, 1401-1404-1404.
- 1301 Hinsch, M., and Staskawicz, B. (1996). Identification of a New Arabidopsis Disease  
1302 Resistance Locus, *RPS4*, and Cloning of the Corresponding Avirulence Gene,  
1303 *avrRps4*, from *Pseudomonas syringae* pv. *ptsi*. *Molecular Plant-Microbe Interactions*  
1304 9, 55.
- 1305 Holub, E.B. (1994). Phenotypic and Genotypic Characterization of Interactions Between  
1306 Isolates of *Peronospora parasitica* and Accessions of *Arabidopsis thaliana*. *Molecular*  
1307 *Plant-Microbe Interactions* 7, 223.
- 1308 Huelsenbeck, J.P., and Ronquist, F. (2001). MRBAYES: Bayesian inference of phylogenetic  
1309 trees. *Bioinformatics* 17, 754-755-755.

- 1310 Hyun, Y., Kim, J., Cho, S.W., Choi, Y., Kim, J.-S., and Coupland, G. (2015). Site-directed  
1311 mutagenesis in *Arabidopsis thaliana* using dividing tissue-targeted RGEN of the  
1312 CRISPR/Cas system to generate heritable null alleles. *Planta* 241, 271-284-284.
- 1313 Jones, J.D.G., Vance, R.E., and Dangl, J.L. (2016). Intracellular innate immune surveillance  
1314 devices in plants and animals. *Science* 354, aaf6395.
- 1315 Karimi, M., Inzé, D., and Depicker, A. (2002). GATEWAY™ vectors for Agrobacterium-  
1316 mediated plant transformation. *Trends in Plant Science* 7, 193-195-195.
- 1317 Katoh, K., and Standley, D.M. (2013). MAFFT Multiple Sequence Alignment Software  
1318 Version 7: Improvements in Performance and Usability. *Molecular Biology and*  
1319 *Evolution* 30, 772-780-780.
- 1320 Katoh, K., Misawa, K., Kuma, K.I., and Miyata, T. (2002). MAFFT: a novel method for rapid  
1321 multiple sequence alignment based on fast Fourier transform. *Nucleic Acids*  
1322 *Research* 30, 3059-3066-3066.
- 1323 Kim, T.-H., Kunz, H.-H., Bhattacharjee, S., Hauser, F., Park, J., Engineer, C., Liu, A., Ha, T.,  
1324 Parker, J.E., Gassmann, W., and Schroeder, J.I. (2012). Natural Variation in Small  
1325 Molecule-Induced TIR-NB-LRR Signaling Induces Root Growth Arrest via EDS1- and  
1326 PAD4-Complexed R Protein VICTR in *Arabidopsis*. *The Plant Cell* 24, 5177-5192-  
1327 5192.
- 1328 Letunic, I., and Bork, P. (2016). Interactive tree of life (iTOL) v3: an online tool for the display  
1329 and annotation of phylogenetic and other trees. *Nucleic Acids Research* 44, W242-  
1330 W245-W245.
- 1331 Li, L., Stoeckert, C.J., and Roos, D.S. (2003). OrthoMCL: Identification of Ortholog Groups  
1332 for Eukaryotic Genomes. *Genome Research* 13, 2178-2189-2189.
- 1333 Liu, H., Ding, Y., Zhou, Y., Jin, W., Xie, K., and Chen, L.-L. (2017). CRISPR-P 2.0: An  
1334 Improved CRISPR-Cas9 Tool for Genome Editing in Plants. *Molecular Plant* 10, 530-  
1335 532-532.
- 1336 Liu, M.-J., Zhao, J., Cai, Q.-L., Liu, G.-C., Wang, J.-R., Zhao, Z.-H., Liu, P., Dai, L., Yan, G.,  
1337 Wang, W.-J., Li, X.-S., Chen, Y., Sun, Y.-D., Liu, Z.-G., Lin, M.-J., Xiao, J., Chen, Y.-  
1338 Y., Li, X.-F., Wu, B., Ma, Y., Jian, J.-B., Yang, W., Yuan, Z., Sun, X.-C., Wei, Y.-L.,  
1339 Yu, L.-L., Zhang, C., Liao, S.-G., He, R.-J., Guang, X.-M., Wang, Z., Zhang, Y.-Y.,  
1340 and Luo, L.-H. (2014). The complex jujube genome provides insights into fruit tree  
1341 biology. *Nature Communications* 5, 5315.
- 1342 Logemann, E., Birkenbihl, R.P., Ülker, B., and Somssich, I.E. (2006). An improved method  
1343 for preparing Agrobacterium cells that simplifies the *Arabidopsis* transformation  
1344 protocol. *Plant Methods* 2, 16.

- 1345 Meyers, B.C., Morgante, M., and Michelmore, R.W. (2002). TIR-X and TIR-NBS proteins: two  
1346 new families related to disease resistance TIR-NBS-LRR proteins encoded in  
1347 Arabidopsis and other plant genomes. *The Plant Journal* 32, 77-92-92.
- 1348 Mine, A., Seyfferth, C., Kracher, B., Berens, M.L., Becker, D., and Tsuda, K. (2018). The  
1349 Defense Phytohormone Signaling Network Enables Rapid, High-Amplitude  
1350 Transcriptional Reprogramming during Effector-Triggered Immunity. *The Plant Cell*  
1351 30, 1199-1219-1219.
- 1352 Mitsuda, N., Ikeda, M., Takada, S., Takiguchi, Y., Kondou, Y., Yoshizumi, T., Fujita, M.,  
1353 Shinozaki, K., Matsui, M., and Ohme-Takagi, M. (2010). Efficient Yeast One-/Two-  
1354 Hybrid Screening Using a Library Composed Only of Transcription Factors in  
1355 Arabidopsis thaliana. *Plant and Cell Physiology* 51, 2145-2151-2151.
- 1356 Ordon, J., Gantner, J., Kemna, J., Schwalgun, L., Reschke, M., Streubel, J., Boch, J., and  
1357 Stuttmann, J. (2017). Generation of chromosomal deletions in dicotyledonous plants  
1358 employing a user-friendly genome editing toolkit. *The Plant Journal* 89, 155-168-168.
- 1359 Peart, J.R., Mestre, P., Lu, R., Malcuit, I., and Baulcombe, D.C. (2005). NRG1, a CC-NB-  
1360 LRR Protein, together with N, a TIR-NB-LRR Protein, Mediates Resistance against  
1361 Tobacco Mosaic Virus. *Current Biology* 15, 968-973-973.
- 1362 Peterson, B.A., Haak, D.C., Nishimura, M.T., Teixeira, P.J.P.L., James, S.R., Dangl, J.L., and  
1363 Nimchuk, Z.L. (2016). Genome-Wide Assessment of Efficiency and Specificity in  
1364 CRISPR/Cas9 Mediated Multiple Site Targeting in Arabidopsis. *PLOS ONE* 11,  
1365 e0162169.
- 1366 Pupko, T., Bell, R.E., Mayrose, I., Glaser, F., and Ben-Tal, N. (2002). Rate4Site: an  
1367 algorithmic tool for the identification of functional regions in proteins by surface  
1368 mapping of evolutionary determinants within their homologues. *Bioinformatics* 18,  
1369 S71-S77-S77.
- 1370 Qi, T., Seong, K., Thomazella, D.P.T., Kim, J.R., Pham, J., Seo, E., Cho, M.-J., Schultink, A.,  
1371 and Staskawicz, B.J. (2018). NRG1 functions downstream of EDS1 to regulate TIR-  
1372 NLR-mediated plant immunity in *Nicotiana benthamiana*. *Proceedings of the National*  
1373 *Academy of Sciences* 115, 201814856.
- 1374 Rietz, S., Stamm, A., Malonek, S., Wagner, S., Becker, D., Medina-Escobar, N., Vlot, A.C.,  
1375 Feys, B.J., Niefind, K., and Parker, J.E. (2011). Different roles of Enhanced Disease  
1376 Susceptibility1 (EDS1) bound to and dissociated from Phytoalexin Deficient4 (PAD4)  
1377 in Arabidopsis immunity. *New Phytologist* 191, 107-119-119.
- 1378 Ronquist, F., and Huelsenbeck, J.P. (2003). MrBayes 3: Bayesian phylogenetic inference  
1379 under mixed models. *Bioinformatics* 19, 1572-1574-1574.

- 1380 Saucet, S.B., Ma, Y., Sarris, P.F., Furzer, O.J., Sohn, K.H., and Jones, J.D.G. (2015). Two  
1381 linked pairs of Arabidopsis TNL resistance genes independently confer recognition of  
1382 bacterial effector AvrRps4. *Nature Communications* 6, 6338.
- 1383 Schultink, A., Qi, T., Bally, J., and Staskawicz, B. (2019). Using forward genetics in *Nicotiana*  
1384 *benthamiana* to uncover the immune signaling pathway mediating recognition of the  
1385 *Xanthomonas perforans* effector XopJ4. *New Phytologist* 221, 1001-1009-1009.
- 1386 Schultink, A., Qi, T., Lee, A., Steinbrenner, A.D., and Staskawicz, B. (2017). Roq1 mediates  
1387 recognition of the *Xanthomonas* and *Pseudomonas* effector proteins XopQ and  
1388 HopQ1. *The Plant Journal* 92, 787-795-795.
- 1389 Shao, Z.-Q., Xue, J.-Y., Wu, P., Zhang, Y.-M., Wu, Y., Hang, Y.-Y., Wang, B., and Chen, J.-  
1390 Q. (2016). Large-Scale Analyses of Angiosperm Nucleotide-Binding Site-Leucine-  
1391 Rich Repeat Genes Reveal Three Anciently Diverged Classes with Distinct  
1392 Evolutionary Patterns. *Plant Physiology* 170, 2095-2109-2109.
- 1393 Sohn, K.H., Segonzac, C., Rallapalli, G., Sarris, P.F., Woo, J.Y., Williams, S.J., Newman,  
1394 T.E., Paek, K.H., Kobe, B., and Jones, J.D.G. (2014). The Nuclear Immune Receptor  
1395 RPS4 Is Required for RRS1<sup>SLH1</sup>-Dependent Constitutive Defense Activation in  
1396 *Arabidopsis thaliana*. *PLoS Genetics* 10, e1004655.
- 1397 Stamatakis, A. (2014). RAxML version 8: a tool for phylogenetic analysis and post-analysis of  
1398 large phylogenies. *Bioinformatics* 30, 1312-1313-1313.
- 1399 Stuttmann, J., Hubberten, H.-M., Rietz, S., Kaur, J., Muskett, P., Guerois, R., Bednarek, P.,  
1400 Hoefgen, R., and Parker, J.E. (2011). Perturbation of Arabidopsis Amino Acid  
1401 Metabolism Causes Incompatibility with the Adapted Biotrophic Pathogen  
1402 *Hyaloperonospora arabidopsidis*. *The Plant Cell* 23, 2788-2803-2803.
- 1403 Talavera, G., and Castresana, J. (2007). Improvement of Phylogenies after Removing  
1404 Divergent and Ambiguously Aligned Blocks from Protein Sequence Alignments.  
1405 *Systematic Biology* 56, 564-577-577.
- 1406 Thieme, F., Koebnik, R., Bekel, T., Berger, C., Boch, J., Büttner, D., Caldana, C., Gaigalat,  
1407 L., Goesmann, A., Kay, S., Kirchner, O., Lanz, C., Linke, B., McHardy, A.C., Meyer,  
1408 F., Mittenhuber, G., Nies, D.H., Niesbach-Klöggen, U., Patschkowski, T., Rückert, C.,  
1409 Rupp, O., Schneiker, S., Schuster, S.C., Vorhölter, F.-J., Weber, E., Pühler, A.,  
1410 Bonas, U., Bartels, D., and Kaiser, O. (2005). Insights into Genome Plasticity and  
1411 Pathogenicity of the Plant Pathogenic Bacterium *Xanthomonas campestris* pv.  
1412 *vesicatoria* Revealed by the Complete Genome Sequence. *Journal of Bacteriology*  
1413 187, 7254-7266-7266.
- 1414 Tsuda, K., Mine, A., Bethke, G., Igarashi, D., Botanga, C.J., Tsuda, Y., Glazebrook, J., Sato,  
1415 M., and Katagiri, F. (2013). Dual Regulation of Gene Expression Mediated by

- 1416 Extended MAPK Activation and Salicylic Acid Contributes to Robust Innate Immunity  
1417 in *Arabidopsis thaliana*. PLoS Genetics 9, e1004015.
- 1418 Tsutsui, H., and Higashiyama, T. (2017). pKAMA-ITACHI Vectors for Highly Efficient  
1419 CRISPR/Cas9-Mediated Gene Knockout in *Arabidopsis thaliana*. Plant and Cell  
1420 Physiology 58, 46-56-56.
- 1421 Van Der Biezen, E.A., Freddie, C.T., Kahn, K., Parker, J.E., and Jones, J.D.G. (2002).  
1422 *Arabidopsis RPP4* is a member of the *RPP5* multigene family of *TIR-NB-LRR* genes  
1423 and confers downy mildew resistance through multiple signalling components. The  
1424 Plant Journal 29, 439-451-451.
- 1425 Venkat, A., Hahn, M.W., and Thornton, J.W. (2018). Multinucleotide mutations cause false  
1426 inferences of lineage-specific positive selection. Nature Ecology & Evolution 2, 1280-  
1427 1288-1288.
- 1428 Venugopal, S.C., Jeong, R.-D., Mandal, M.K., Zhu, S., Chandra-Shekara, A.C., Xia, Y.,  
1429 Hersh, M., Stromberg, A.J., Navarre, D., Kachroo, A., and Kachroo, P. (2009).  
1430 Enhanced Disease Susceptibility 1 and Salicylic Acid Act Redundantly to Regulate  
1431 Resistance Gene-Mediated Signaling. PLoS Genetics 5, e1000545.
- 1432 Wagner, S., Stuttmann, J., Rietz, S., Guerois, R., Brunstein, E., Bautor, J., Niefind, K., and  
1433 Parker, Jane E. (2013). Structural Basis for Signaling by Exclusive EDS1 Heteromeric  
1434 Complexes with SAG101 or PAD4 in Plant Innate Immunity. Cell Host & Microbe 14,  
1435 619-630-630.
- 1436 Wiermer, M., Feys, B.J., and Parker, J.E. (2005). Plant immunity: the EDS1 regulatory node.  
1437 Current Opinion in Plant Biology 8, 383-389-389.
- 1438 Wirthmueller, L., Zhang, Y., Jones, J.D.G., and Parker, J.E. (2007). Nuclear Accumulation of  
1439 the *Arabidopsis* Immune Receptor RPS4 Is Necessary for Triggering EDS1-  
1440 Dependent Defense. Current biology : CB 17, 2023-2029-2029.
- 1441 Witte, C.-P., Noël, L., Gielbert, J., Parker, J., and Romeis, T. (2004). Rapid one-step protein  
1442 purification from plant material using the eight-amino acid StrepII epitope. Plant  
1443 Molecular Biology 55, 135-147-147.
- 1444 Wróblewski, T., Spiridon, L., Martin, E.C., Petrescu, A.-J., Cavanaugh, K., Jose-Truco, M.,  
1445 Xu, H., Gozdowski, D., Pawłowski, K., Michelmore, R.W., and Takken, F.L.W. (2018).  
1446 Genome-wide functional analyses of plant coiled-coil NLR-type pathogen receptors  
1447 reveal essential roles of their N-terminal domain in oligomerization, networking, and  
1448 immunity. PLOS Biology 16, e2005821.
- 1449 Wu, C.-H., Derevnina, L., and Kamoun, S. (2018a). Receptor networks underpin plant  
1450 immunity. Science 360, 1300-1301-1301.



- 1451 Wu, C.-H., Abd-El-Halim, A., Bozkurt, T.O., Belhaj, K., Terauchi, R., Vossen, J.H., and  
1452 Kamoun, S. (2017). NLR network mediates immunity to diverse plant pathogens.  
1453 Proceedings of the National Academy of Sciences 114, 8113-8118-8118.
- 1454 Wu, Z., Li, M., Dong, O.X., Xia, S., Liang, W., Bao, Y., Wasteneys, G., and Li, X. (2018b).  
1455 Differential regulation of TNL-mediated immune signaling by redundant helper CNLs.  
1456 New Phytologist.
- 1457 Xu, F., Zhu, C., Cevik, V., Johnson, K., Liu, Y., Sohn, K., Jones, J.D., Holub, E.B., and Li, X.  
1458 (2015). Autoimmunity conferred by *chs3-2D* relies on *CSA1*, its adjacent TNL-  
1459 encoding neighbour. Scientific Reports 5, 8792.
- 1460 Yang, Z. (2007). PAML 4: Phylogenetic Analysis by Maximum Likelihood. Molecular Biology  
1461 and Evolution 24, 1586-1591-1591.
- 1462 Zhang, X., Dodds, P.N., and Bernoux, M. (2016a). What Do We Know About NOD-Like  
1463 Receptors In Plant Immunity? Annual Review of Phytopathology 55, 1-25-25.
- 1464 Zhang, Y., Goritschnig, S., Dong, X., and Li, X. (2003). A Gain-of-Function Mutation in a  
1465 Plant Disease Resistance Gene Leads to Constitutive Activation of Downstream  
1466 Signal Transduction Pathways in suppressor of *npr1-1*, constitutive 1. The Plant Cell  
1467 Online 15, 2636-2646-2646.
- 1468 Zhang, Y., Xia, R., Kuang, H., and Meyers, B.C. (2016b). The Diversification of Plant NBS-  
1469 LRR Defense Genes Directs the Evolution of MicroRNAs That Target Them.  
1470 Molecular biology and evolution 33, 2692-2705-2705.
- 1471 Zheng, X.-y., Spivey, Natalie W., Zeng, W., Liu, P.-P., Fu, Zheng Q., Klessig, Daniel F., He,  
1472 Sheng Y., and Dong, X. (2012). Coronatine Promotes *Pseudomonas syringae*  
1473 Virulence in Plants by Activating a Signaling Cascade that Inhibits Salicylic Acid  
1474 Accumulation. Cell host & microbe 11, 587-596-596.
- 1475 Zhong, Y., and Cheng, Z.-M. (2016). A unique RPW8-encoding class of genes that originated  
1476 in early land plants and evolved through domain fission, fusion, and duplication.  
1477 Scientific Reports 6, 32923.
- 1478 Zhou, N., Tootle, T.L., Tsui, F., Klessig, D.F., and Glazebrook, J. (1998). PAD4 Functions  
1479 Upstream from Salicylic Acid to Control Defense Responses in Arabidopsis. The  
1480 Plant Cell 10, 1021-1030-1030.
- 1481 Zou, C., Chen, A., Xiao, L., Muller, H.M., Ache, P., Haberer, G., Zhang, M., Jia, W., Deng, P.,  
1482 Huang, R., Lang, D., Li, F., Zhan, D., Wu, X., Zhang, H., Bohm, J., Liu, R., Shabala,  
1483 S., Hedrich, R., Zhu, J.-K., and Zhang, H. (2017). A high-quality genome assembly of  
1484 quinoa provides insights into the molecular basis of salt bladder-based salinity  
1485 tolerance and the exceptional nutritional value. Cell Research 27, 1327.

1486

1487
